# Supplementary material
Source: PubMed Central journal article supplement (PMC2853975)
Supplement: NIHMS82005-supplement-01.pdf [file NIHMS82005-supplement-01.pdf]

Supplemental Data

SIRT1 Redistribution on Chromatin

Promotes Genomic Stability but Alters

Gene Expression during Aging

Philipp Oberdoerffer, Shaday Michan, Michael McVay, Raul Mostoslavsky, James Vann, Sang-Kyu Park, Andrea Hartlerode, Judith Stegmuller, Angela Hafner, Patrick Loerch, Sarah M. Wright, Kevin D. Mills, Azad Bonni, Bruce A. Yankner, Ralph Scully, Tomas A. Prolla, Frederick W. Alt, and David A. Sinclair

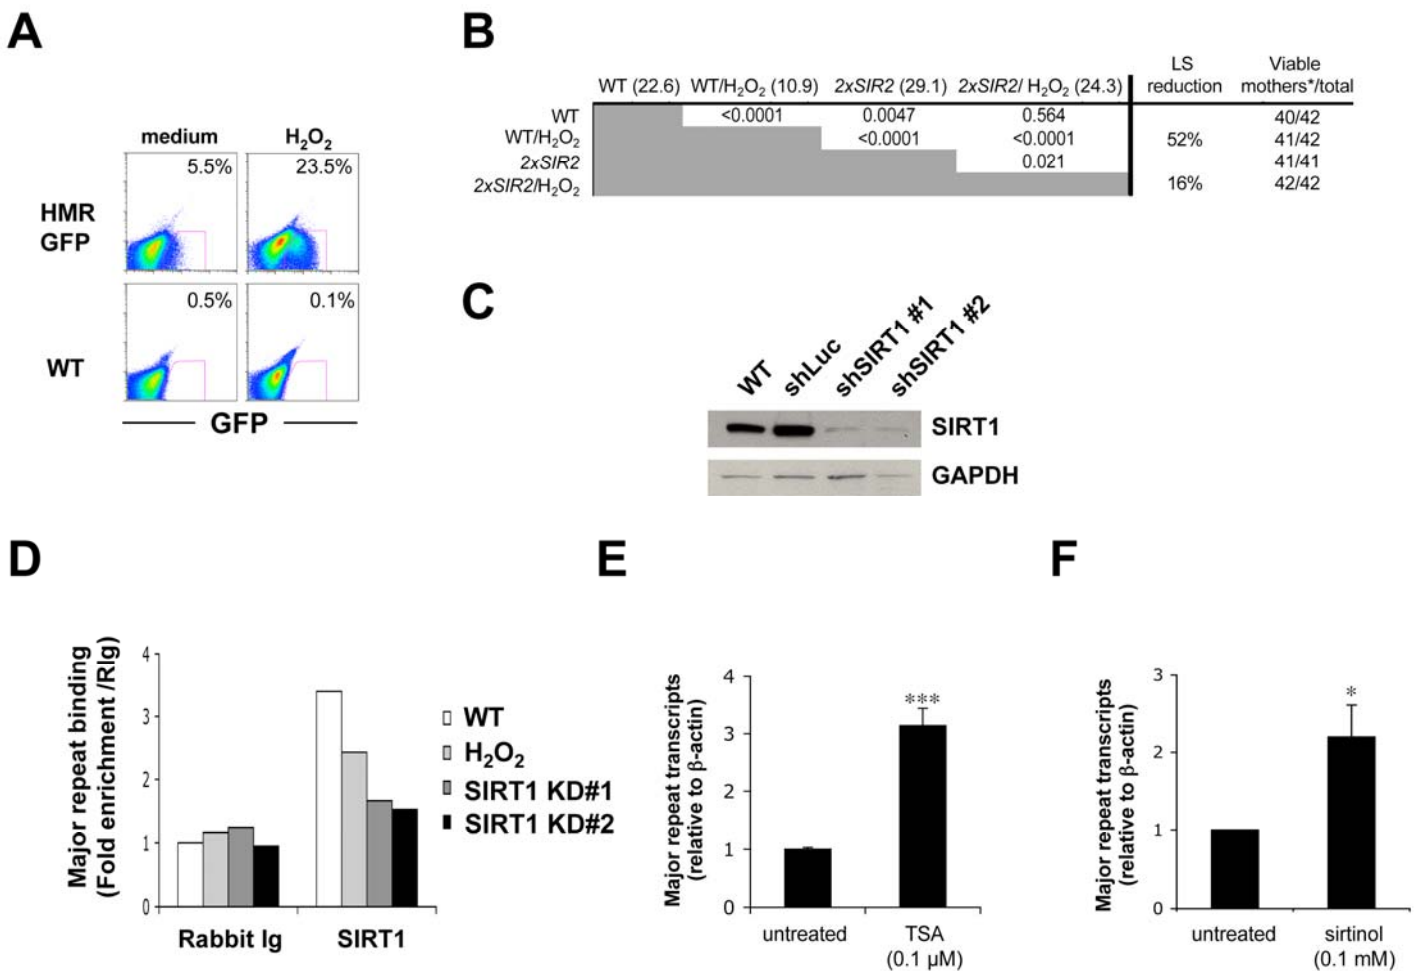

**Figure S1.** (A) FACS analysis of loss of mating type silencing using *HMR::GFP* or isogenic control yeast cells. Cells were left untreated or treated with H<sub>2</sub>O<sub>2</sub>. The fraction of GFP<sup>+</sup> cells is indicated. (B) P values and mean replicative lifespans for the experiments in Figure 1C, the viability of yeast mother cells was not affected by H<sub>2</sub>O<sub>2</sub>. \* Number of mother cells that have undergone at least 1 division. (C) Western blot analysis of SIRT1 knock-down in two independently derived stable, polyclonal ES cell populations. A stably integrated luciferase-specific hairpin served as scrambled control (shLuc). (D) Quantitative PCR (q-PCR) analysis of ChIP experiments using a SIRT1-specific antibody

or rabbit control Ig. Stable SIRT1 knock-down ES cell lines and wild-type ES cells that were left untreated or treated with H<sub>2</sub>O<sub>2</sub> for 1h were subjected to ChIP followed by q-PCR analysis for major satellite repeat DNA. (E, F) q-RT-PCR analysis of major satellite repeat transcripts in response to TSA treatment (0.1 μM, 16-24 h) or sirtinol treatment (100 μM, 16-24h). Data are represented as mean +/- SEM.

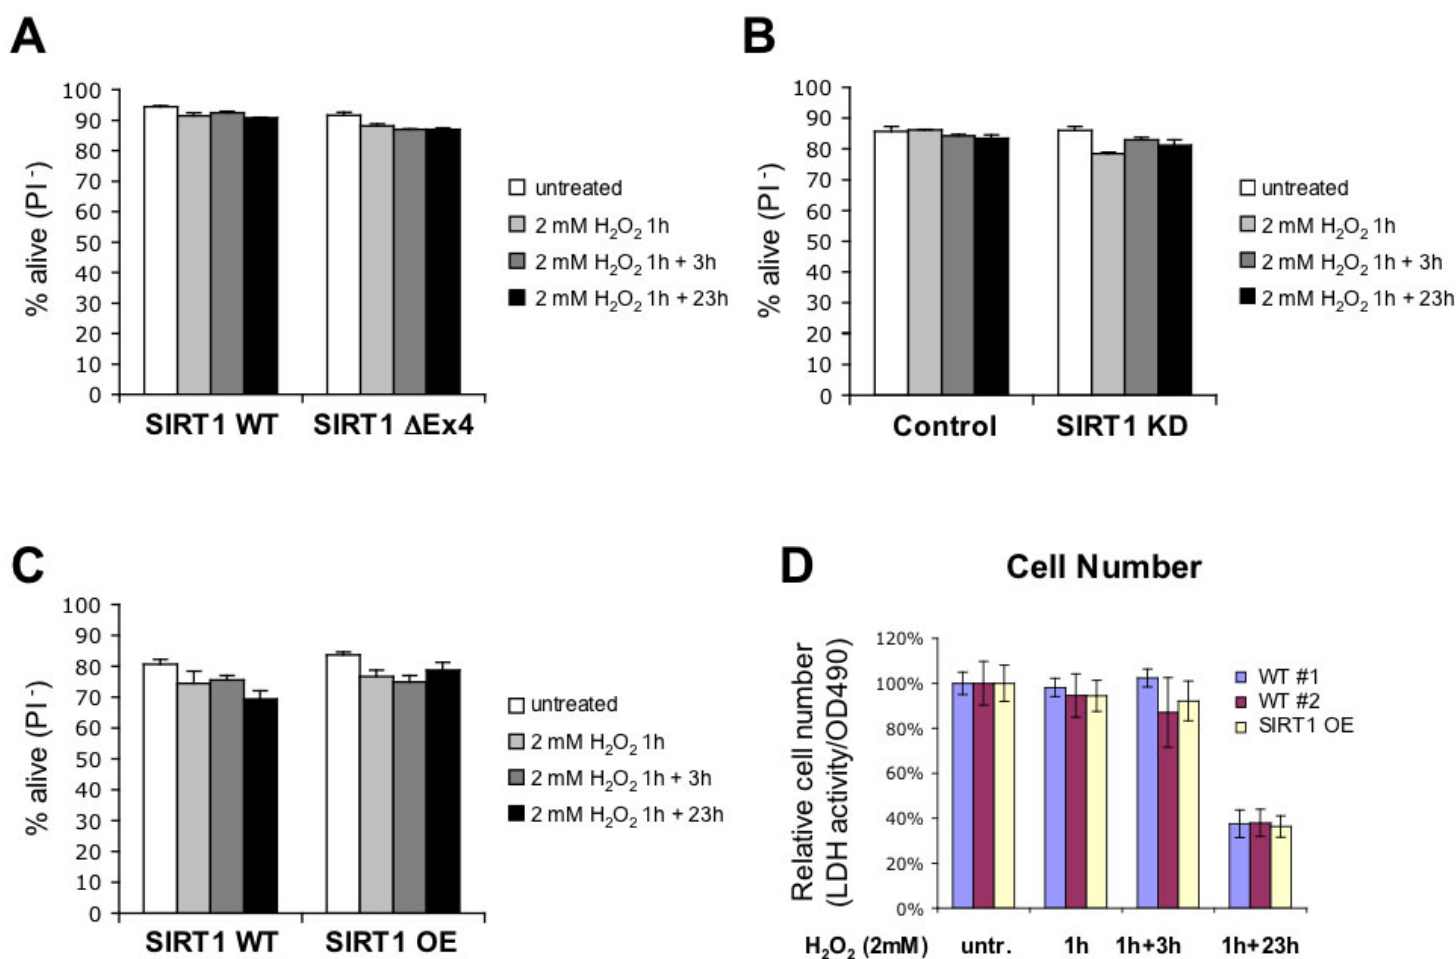

**Figure S2.** Cell survival of SIRT1 overexpressing or deficient ES cells in response to H<sub>2</sub>O<sub>2</sub>. (A-C). Fraction of live cells as determined by propidium iodide exclusion (PI<sup>-</sup>) in response to a 1h treatment with 2 mM H<sub>2</sub>O<sub>2</sub>. Analysis was performed at the indicated time-points, SIRT1 KO (ΔEx4) cells (A), SIRT1 knock-down (KD) cells (B) and SIRT1 overexpressing (OE) cells (C) were compared to their respective unmanipulated controls (WT). (D) Number of viable WT and SIRT1 overexpressing cells after indicated H<sub>2</sub>O<sub>2</sub> treatments. Viable cells were assessed by measuring LDH activity using the CytoTox 96 non-radioactive Cytotoxicity Assay (Promega) following the manufacturer's instructions. Relative cell numbers were determined as the percentage of LDH activity compared to untreated controls.

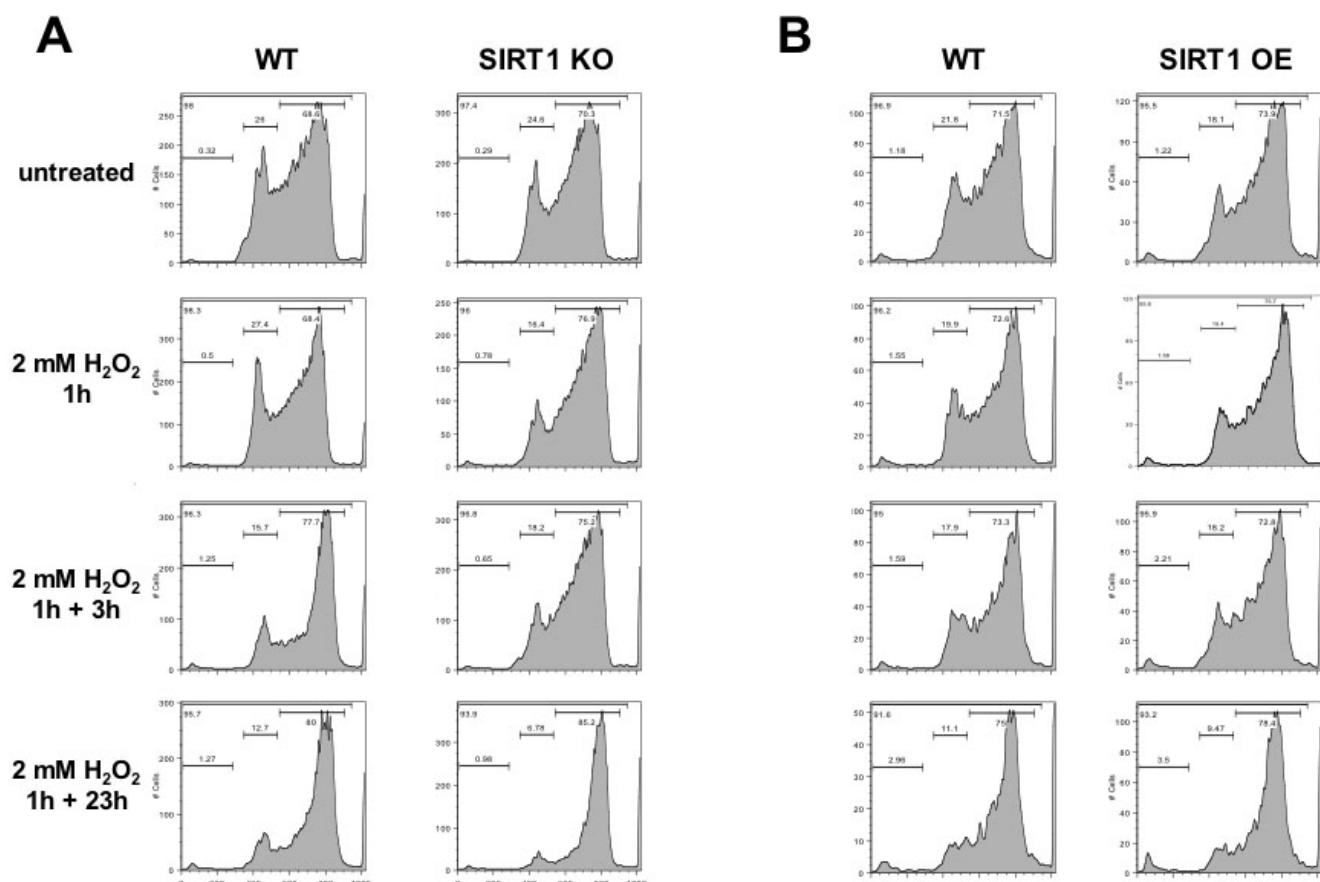

**Figure S3.** Cell cycle analysis of SIRT1 deficient (A) or overexpressing ES cells (B) in response to H<sub>2</sub>O<sub>2</sub>. DNA content was measured by PI staining of ethanol-fixed, Tween-permeabilized cells at the indicated time-points after a 1h H<sub>2</sub>O<sub>2</sub> treatment.

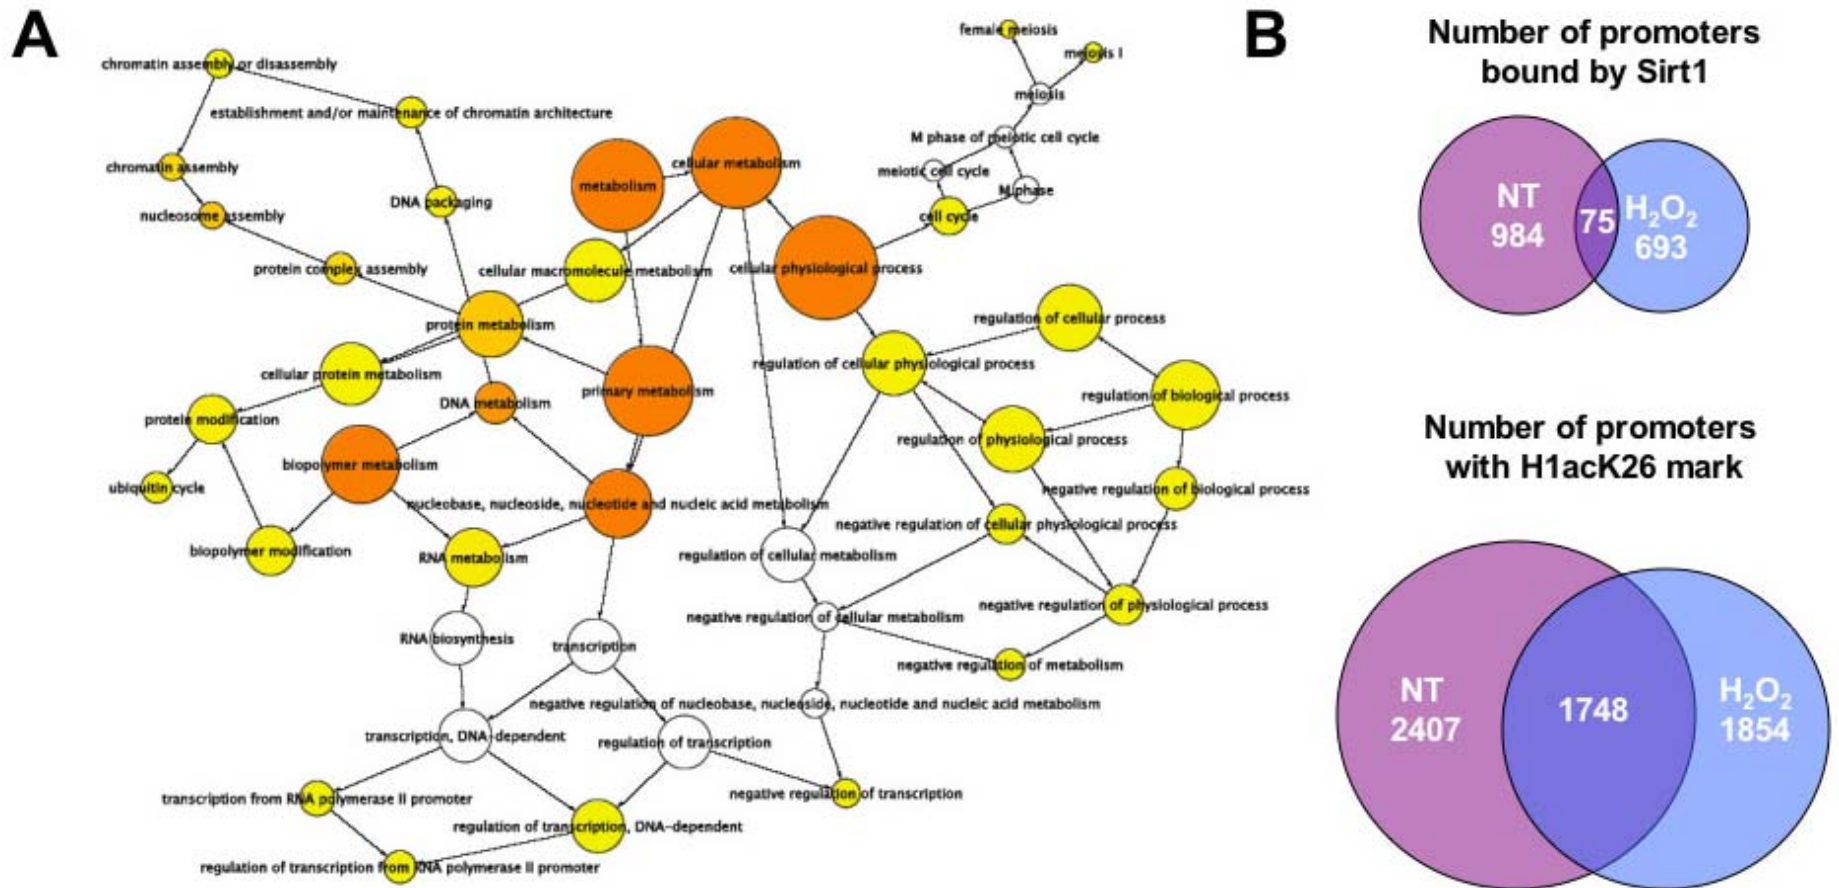

**Figure S4.** (A) Gene ontology (GO) cluster analysis of SIRT1 target genes based on GO gene function. SIRT1-associated promoters ( $FDR < 0.1$ ) were clustered using BiNGO analysis. Colored nodes represent groups that are significantly over-represented, the color intensity reflects the level of significance (increasing from yellow to orange). (B) Venn diagram of SIRT1 associated Nimblegen probe sets (top) and H1AcK26 associated probe sets (bottom) before (red) and after H<sub>2</sub>O<sub>2</sub> treatment (blue). Shown are SIRT1-enriched probe sets with an  $FDR < 0.1$ , numbers indicate how many probe sets can be found in the respective subsets.

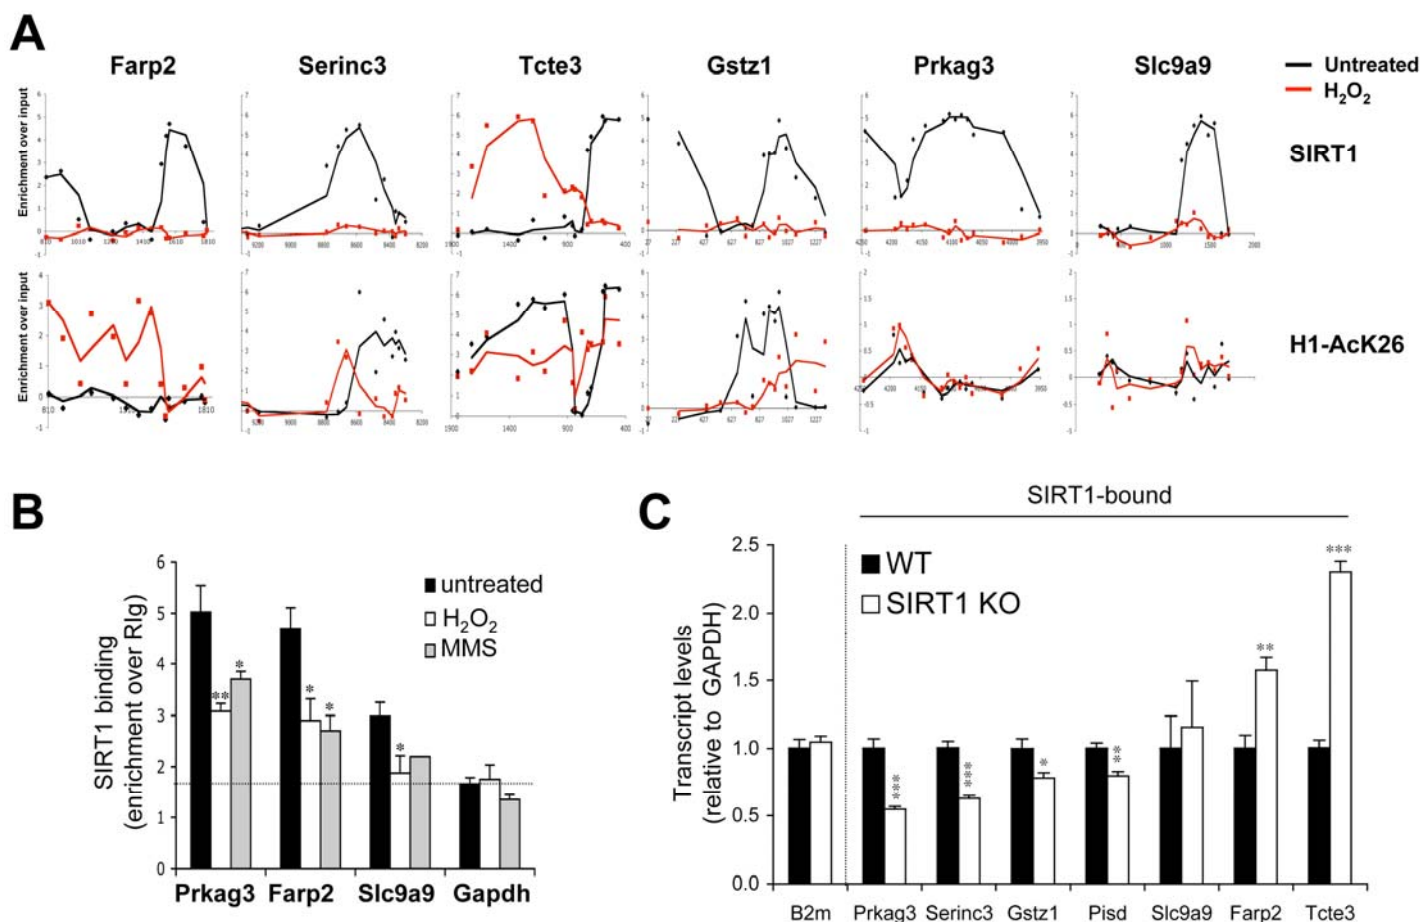

**Figure S5.** (A) SIRT1 and H1AcK26 binding profiles at promoters of SIRT1 target genes that are upregulated in response to H<sub>2</sub>O<sub>2</sub> treatment and contain at least one 50mer probe with a H1AcK26 signal  $\geq 1\log_2$ . (B) Validation of SIRT1 association with selected target promoters. ES cells were either left untreated or treated with 2 mM H<sub>2</sub>O<sub>2</sub> or 1 mM MMS for 1 h, subjected to ChIP for SIRT1 or a rabbit control Ig, followed by q-PCR analysis of promoters of the indicated genes. Fold enrichment was calculated based on the average background signal obtained with rabbit Ig alone for each promoter. Data are represented as mean  $\pm$  SEM. GAPDH served as a control locus. P values are based on student's one-tailed t-test. (C) q-PCR gene expression analysis of SIRT1 target genes from Figure 3 in WT or SIRT1  $\Delta$ Ex4 (KO) ES cells. All samples were normalized to GAPDH, b2m is shown as a control.

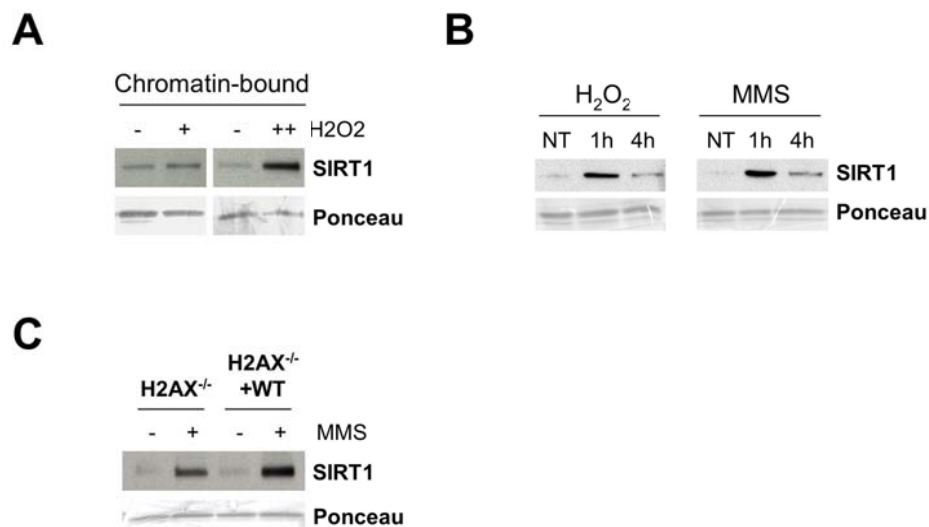

**Figure S6.** (A-C) Western blot analyses of chromatin-bound SIRT1 protein. (A) SIRT1 recruitment increases with increasing doses of H<sub>2</sub>O<sub>2</sub>. (B) SIRT1 recruitment to chromatin is transient. Cells were treated with H<sub>2</sub>O<sub>2</sub> (2 mM) or MMS (2 mM) for 1 h, followed by a 3 h recovery in medium (4 h). (C) SIRT1 recruitment upon MMS-treatment is reduced in H2AX-deficient (H2AX<sup>-/-</sup>) ES cells compared to H2AX<sup>-/-</sup> cells reconstituted with WT H2AX. Ponceau staining for histones is shown as loading control.

A

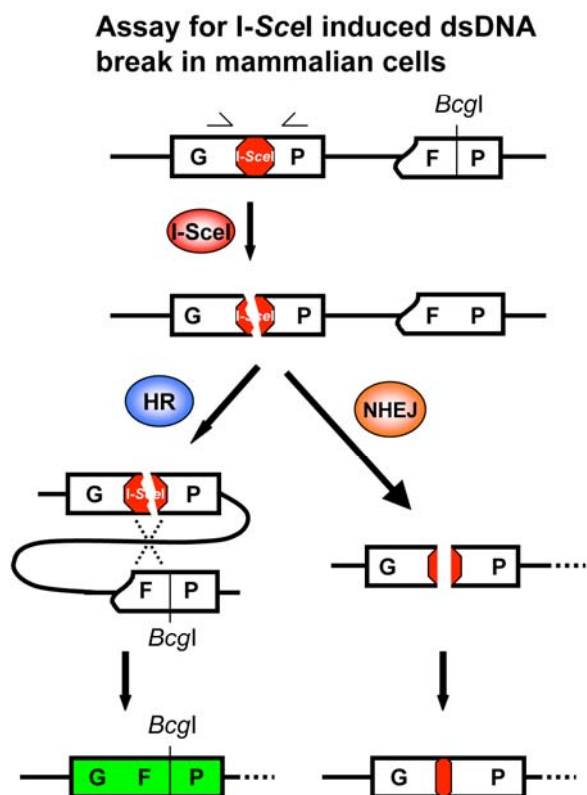

B

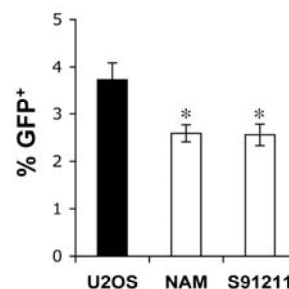

C

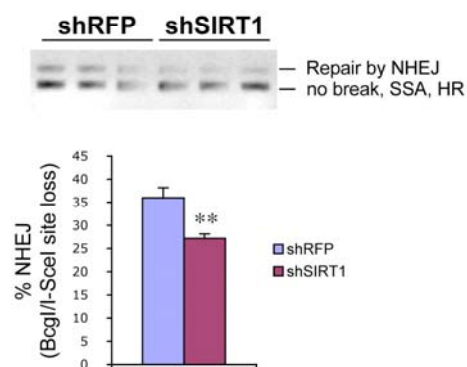

**Figure S7.** (A) Schematic illustrating I-SceI mediated DSB induction and repair using the *DRGFP* transgene. This transgene consists of a GFP encoding cDNA that has an endogenous *BcgI* restriction site replaced by an I-SceI restriction site, and is, thereby, rendered non-functional. Transfection with an I-SceI encoding plasmid (pCBASce) induces a DSB at the I-SceI site. An incomplete *GFP* sequence (FP) is located downstream and can serve as a donor for intra-chromosomal homologous recombination (HR), one way of repairing the I-SceI mediated DSB. Repair by HR restores a functional GFP cDNA including the endogenous *BcgI* site and can be detected by FACS. Non-homologous end-joining (NHEJ) results in the imprecise fusion of the broken ends, causing a loss of the I-SceI site but no restoration of *GFP* or the *BcgI* site. Repair by NHEJ can be estimated by PCR amplification of the *GFP* gene (primers are indicated, see Table S5) and subsequent restriction digest with *BcgI* and I-SceI. The fraction of PCR products that are insensitive to either I-SceI or *BcgI* digestion reflects the NHEJ frequency (Weinstock et al., 2006). (B) HR efficiency in *DRGFP* transgenic U2OS cells exposed to the sirtuin inhibitors NAM or S91211. Cells were treated with 10 mM NAM or 50  $\mu$ M S91211 starting 2 h prior to transfection with either pCBASce or pCAGGS-Ds-red. Recombination was measured 48 h later by measuring the fraction of GFP<sup>+</sup> cells. Ds-red was used to determine transfection efficiency. The ratio of GFP<sup>+</sup> to Ds-red<sup>+</sup> cells is graphed for untreated (closed bar) and NAM or S91211 treated cells (open bars). Experiments were done in triplicate, data are represented as mean  $\pm$  SEM. (C) NHEJ analysis of *DRGFP* transgenic U2OS cells stably knocked-down for either RFP (scrambled control) or SIRT1 (Figure 5). PCR products were digested with I-SceI and *BcgI* and separated by gel electrophoresis. The undigested PCR product (top band) reflects

DNA repaired by NHEJ, the bottom band results from digestion with *BcgI* or *I-SceI* and reflects unrepaired DNA as well as DNA repaired by HR or single-strand annealing (SSA). Band intensities were quantified using ImageJ. The ratio of top to bottom band adjusted for the band size (in bp) represents the frequency of repair by NHEJ, data are represented as mean +/- SEM.

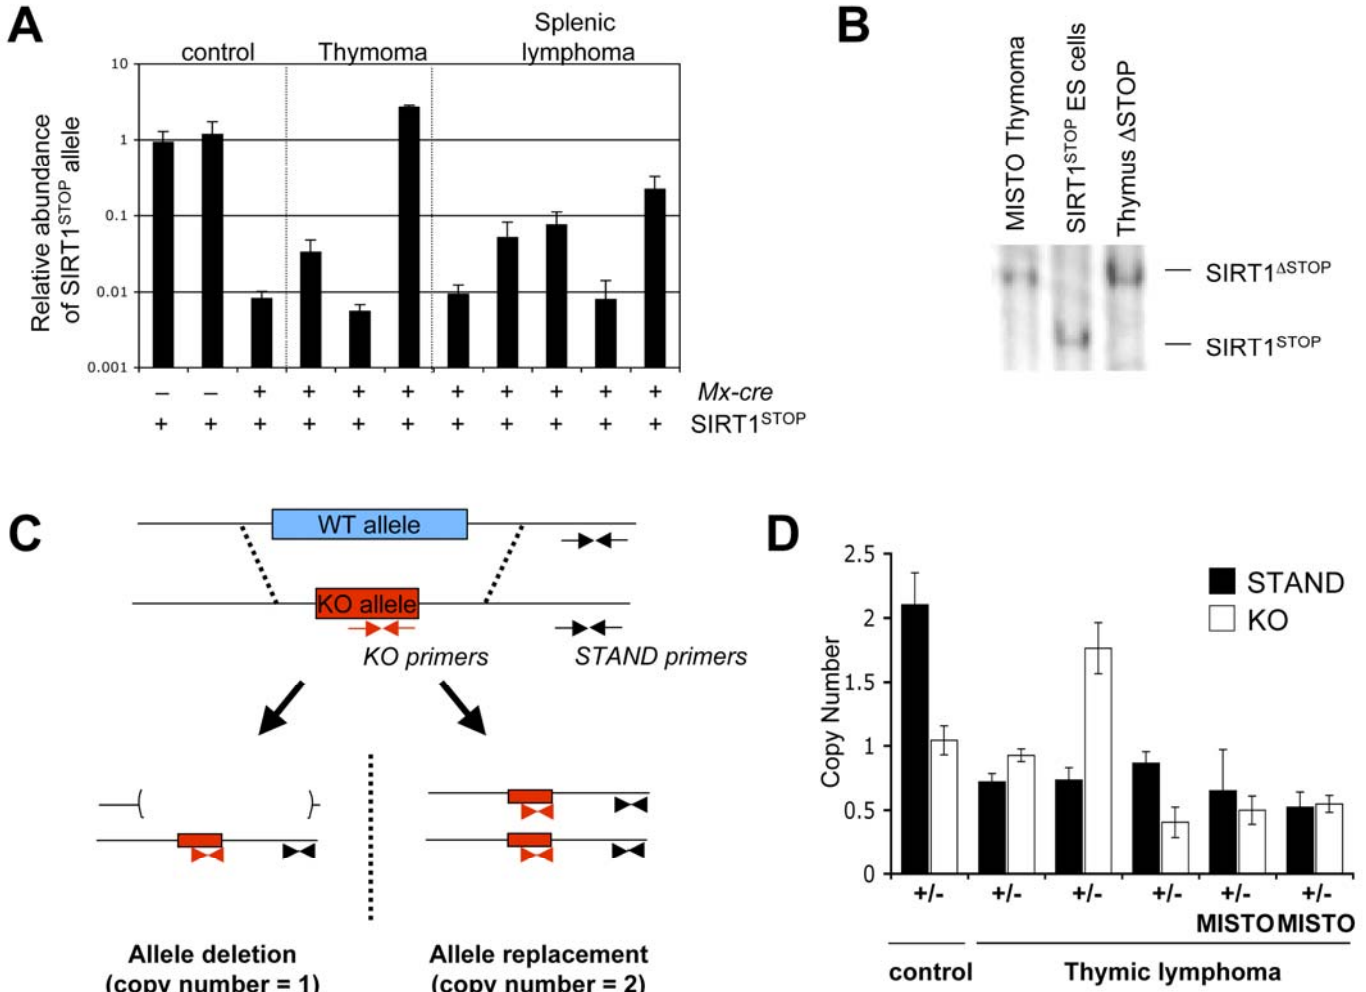

**Figure S8.** (A and B) Efficiency of Cre-mediated deletion in MISTO mice. (A) Genomic DNA from the indicated tumor tissues was subjected to q-PCR analysis of the *SIRT1*<sup>STOP</sup> locus and three control loci (*ube2i* promoter, *gapdh* promoter and *SIRT1* exon 4). The ratio of *SIRT1*<sup>STOP</sup> to control in tissue lacking the *Mx-cre* transgene was set as 1. Shown is average and S.D. of *SIRT1*<sup>STOP</sup> abundance. One MISTO-transgenic thymic lymphoma showed no signs of deletion and was excluded from the analysis. (B) Southern blot analysis of tumor and control DNAs using a *SIRT1*<sup>STOP</sup> specific radio-labeled probe. (C and D) LOH at the *p53* locus in thymic lymphomas from irradiated *p53*<sup>+/-</sup> mice. (C) LOH at the *p53* locus can occur through allele deletion (left) or allele replacement by gene conversion (right). q-PCR analysis can be utilized to detect these events by amplifying either a DNA segment specific for the *p53*-deficient allele (KO, red), or an adjacent control segment present in both the WT and the KO allele (STAND, black). (D) q-PCR



analysis of LOH at the *p53* locus. DNA from five thymic lymphomas obtained from irradiated control (*p53*<sup>+/-</sup>) or experimental (MISTO; *p53*<sup>+/-</sup>) mice was analyzed using primers indicated in (C), PCR products were normalized to a set of four control genes (Ldk, PrkCD, G22, CD28) to determine the copy number for each allele using a known *p53*<sup>+/-</sup> sample as reference. Data are represented as mean +/- SEM. All tumors showed loss of one STAND copy but not the KO copy, indicative of *p53* LOH by allele deletion. One tumor showed an increase in KO copy number, possibly due to a duplication event involving the KO allele. Primer sequences are available upon request.

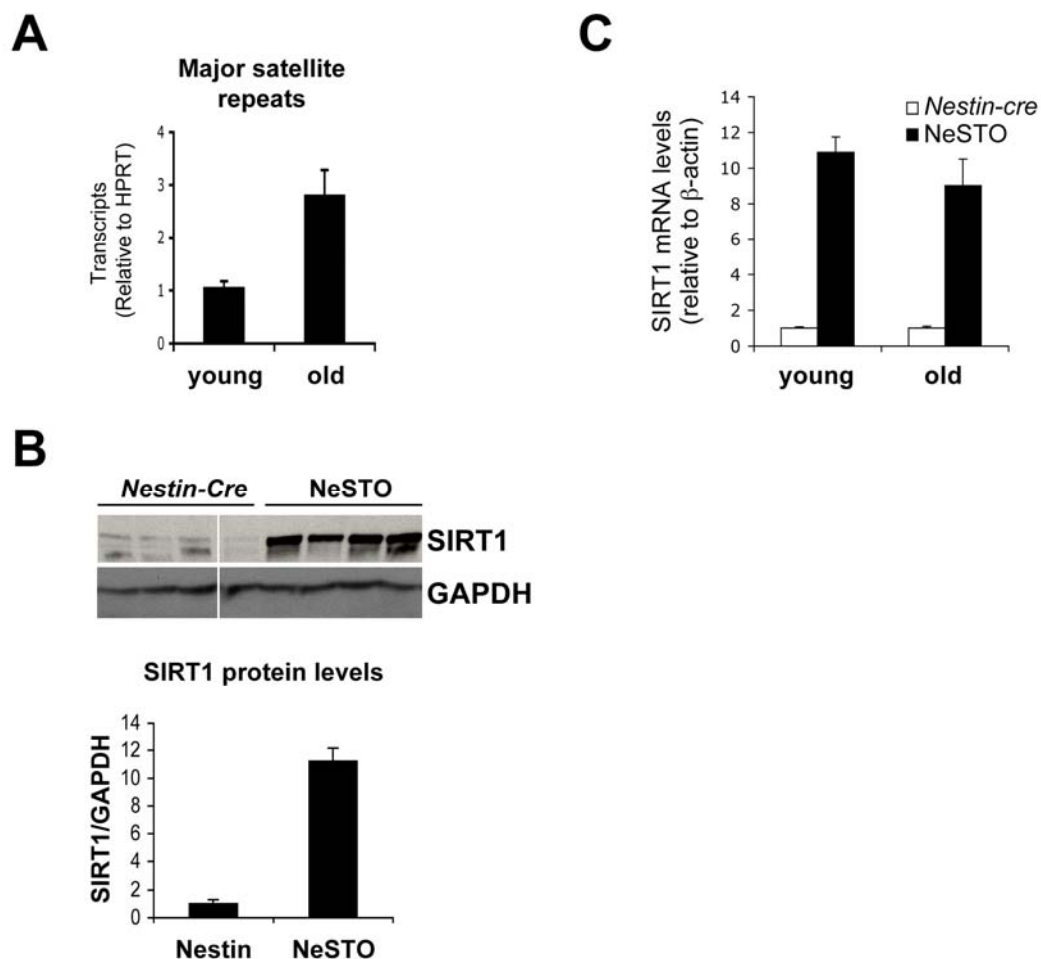

**Figure S9.** (A) Age-dependent increase in major satellite repeat transcripts in mice. RNA from young (2 months, n = 6) and old (24 months, n = 6) mouse cortices was subjected to q-RT-PCR. Samples were normalized to HPRT. (B) and (C) SIRT1 protein (B) and mRNA expression (C) in NeSTO mice and *Nestin-cre* littermate controls. Expression of SIRT1 in NeSTO mice was generally 9-13-fold higher than in *Nestin-cre* littermate controls, although there was a subset of mice with very high expression (20-fold or greater), which was not considered for further analysis. Data are represented as mean +/- SEM, analyzing young (8-10 months) animals (C) and old (18-19 months) animals (B and C).

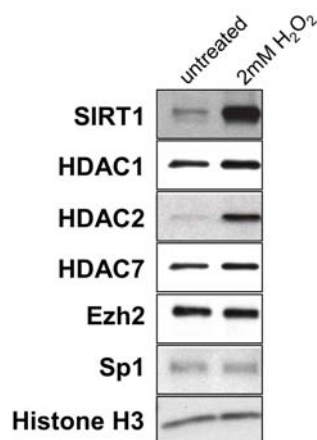

**Figure S10.** Western blot analysis of SIRT1 and indicated control proteins in the chromatin-bound protein fraction of ES cells that were either left untreated or treated with H<sub>2</sub>O<sub>2</sub> for 1 h. Antibodies against HDAC1, HDAC2 and HDAC7 were from Santa Cruz, anti-Ezh2 from BD Biosciences. The antibody against Spe1 was kindly provided by Dr. G. Gill.

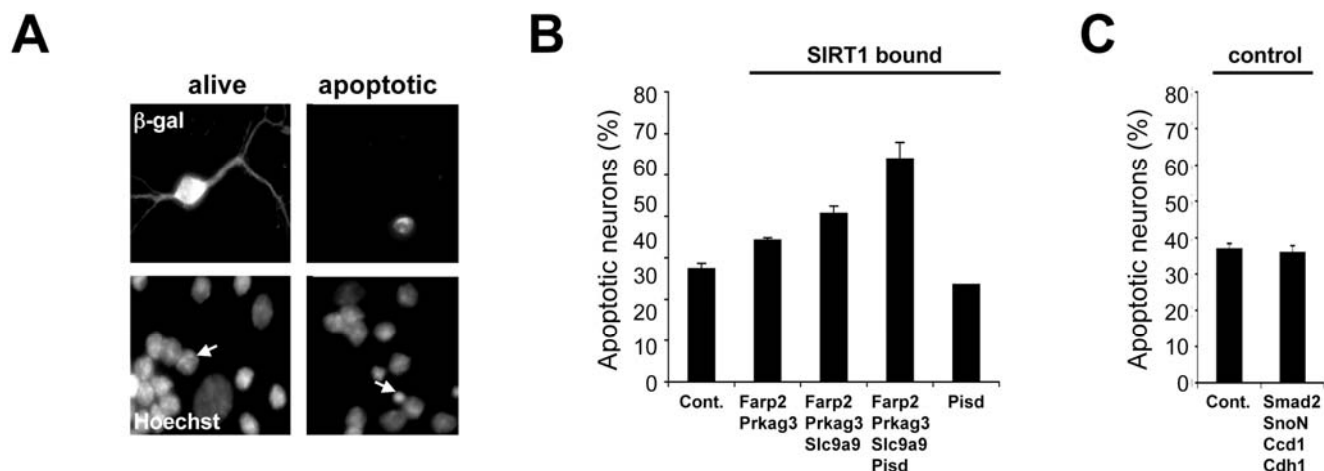

**Figure S11.** (A) Apoptosis of cerebellar granule neurons. Cerebellar granule neurons were prepared from isolated cerebella of P6 Long-Evans rat pups and were transfected 48 h after plating with a modified calcium phosphate method (Becker and Bonni, 2006). Cells were fixed 72 h thereafter and stained for  $\beta$ -gal and Hoechst. Expression vectors (pCMV-SPORT6) for mFarp2, hPrkag3, mPisd and hSlc9a9 were from Open Biosystems. p $\beta$ -Gal, pCMV5, pCMV5-hCdh1, pCMV5-hSmad2 and pCMV5-hSnoN were from A. Bonni, pCMV5-hCcd1 was a gift from S.-C. Lin (Hong Kong University of Science and Technology). Disintegration of neuronal processes and nuclear condensation indicated apoptosis of  $\beta$ -gal<sup>+</sup> cells, representative live and apoptotic neurons are shown. (B and C) Analysis of apoptosis upon ectopic overexpression of the indicated genes in primary rat neurons. (B) Cerebellar granule neurons were transfected with a pCMV-SPORT6 empty vector (2  $\mu$ g), the indicated combinations of expression vectors for the SIRT1-associated genes prkag3, slc9a9, pisd and farp2 (0.5  $\mu$ g each), or 2  $\mu$ g of the pisd expression vector. (C) Granule neurons were transfected with a pCMV5 empty control vector (2  $\mu$ g) or a

combination of the indicated non-SIRT1-associated genes (0.5 µg each). Data are represented as mean +/- SEM.

**Table S1.** List of genes in overrepresented gene ontology groups. 574 annotated genes were identified amongst SIRT1-associated promoters (*FDR* < 0.01) out of 15850 whole annotations. Selected: number of SIRT1-associated promoters per GO group, total: all genes per GO group. \*: Benjamini-Hochberg FDR correction.

| GO-ID | p-value  | corr. p-value* | selected | total | Description                    | Genes in test set                                                                                                                                                                                                                                                                                                                                                                                                                                                                                                                                                                                                                                                                                                                                                                                                                                                                                                                                                                                                                                                                                                                                                                                                                                                                                                                                                                                                                                                                                                                                                                                                                                                                                                                                                       |
|-------|----------|----------------|----------|-------|--------------------------------|-------------------------------------------------------------------------------------------------------------------------------------------------------------------------------------------------------------------------------------------------------------------------------------------------------------------------------------------------------------------------------------------------------------------------------------------------------------------------------------------------------------------------------------------------------------------------------------------------------------------------------------------------------------------------------------------------------------------------------------------------------------------------------------------------------------------------------------------------------------------------------------------------------------------------------------------------------------------------------------------------------------------------------------------------------------------------------------------------------------------------------------------------------------------------------------------------------------------------------------------------------------------------------------------------------------------------------------------------------------------------------------------------------------------------------------------------------------------------------------------------------------------------------------------------------------------------------------------------------------------------------------------------------------------------------------------------------------------------------------------------------------------------|
| 43283 | 3.57E-15 | 3.29E-12       | 253      | 4593  | biopolymer metabolism          | CDK6 HIST1H2BM FBXL14 TSSK3 PLAGL2 HIST1H2BP RPO1-1 TARS RBM4 2610031L17RIK BRD8 PJA1 CDC40 MAST2 GYS1 MAST1 ILF3 PTPRK MSC PCSK1N RG9MTD2 GM711 MYT1L ERCC2 TSHZ3 CBX2 HIST1H3D FBXO6B TRERF1 USP3 PRKAR1A HIST2H3C2 HNRPF BRWD1 BIRC1C CRKRS SRRM2 RG9MTD1 UBE2E3 PDK3 HIST1H3C UBE2D3 ADRA1D SPCS1 ZFP263 C2TA SRRM1 HIST1H3E PHF10 POMT2 TEP1 HIST1H3F USP43 SNRPE MECP2 HIST2H3C1 DCAMKL2 UBB IRX3 PIAS2 NPR2 CHD4 IRX6 ORC1L PIAS3 NOL5A STAMBP GLIS2 POFUT1 FEM1A VAX1 SPIN MBD4 EDG2 C77668 INVS TWIST2 EPHB2 SMARCAL1 EBF2 1700030G11RIK CDK7 ZBTB1 PRMT5 SMARCA5 ZBTB37 UHMK1 AMFR PRPF31 HOXD8 HECW1 TCERG1 RFC2 PLAT SERTAD2 FBXO38 PAPOLG SIM1 ADPRH TDG WRNIP1 MGAT3 SNRPB2 BACE2 LHX6 NOTCH2 CTCF D11ERTD730E BTK DCLRE1B UBQLN4 9130017K11RIK OAS2 4930429M06RIK PSMA7 ROR2 PHKA2 UBE2T HIST2H2AA1 STC1 3230401I01RIK HIST1H1B DPH5 ZFP715 SPO11 KLF3 OPN3 ZFX1A REX2 RNASEH2A UBTD1 CDC16 D7WSU128E BRCC3 A730008L03RIK 4930432O21RIK CUTL1 SS18L1 CSNK1G1 B3GALT6 PRKCBP1 TGIF2 GIYD2 MAL SLA2 WWTR1 HEMK1 2610305D13RIK CCNE2 MMS19L FBXO44 RUVBL2 PIGQ ZFP397 4933424A20RIK PHF6 PSMB5 CDX4 RWDD4A TM4SF4 U2AF2 GAG NCOA2 PHF15 TBX2 FBXL21 BCL6B DDX54 PRPF18 TBX3 SUZ12 UGP2 UBE2M 9030624G23RIK PARS2 HIST2H2AA2 D1ERTD161E TSC22D4 OASL1 THRAP5 NR2F2 MLH3 RXRB FHIT E2F7 RPS27A DRAP1 FOSL1 PCOLN3 A630042L21RIK RBMXRT HIST1H3B FANCC RBK MEN1 C330022B21RIK C2FAH SGIP1 HLCS SMAD1 PIGT TXNL4B ZFP580 SF3B2 RHOX5 E2F6 TARSL2 KLHL12 STK38L ELF1 NKX2-6 SYCP1 WBP4 ZFP579 E2F8 RELB BC012278 HIST1H3A ZDHHC7 RHOX4E VARS2 HIST1H3G MYNN DUSP3 HIST1H3I CUL4A UBE3B CDC25C ADAMTS2 FOXJ3 2400003N08RIK NFE2L2 USP27X PTPRG HIST1H3H CEBPB PRKAG3 PPP1R12B RPA3 B3GNT6 RHOX4A DBF4 TRAK1 CDC7 HS2ST1 ATF7 PPP1CA CLN8 ATG9A HIST2H3B DDB2 TLDR |
| 8151  | 4.62E-15 | 3.29E-12       | 471      | 10754 | cellular physiological process | CKS1B APOE MUC5AC FBXL14 ETF1 PLAGL2 HIST1H2BP RPO1-1 MCPT1 KYNUI RBM4 RANBP1 2610031L17RIK SIL1 FDPS BRD8 PJA1 CHML MAST1 MYH8 MSC PCSK1N RG9MTD2 ATP6V1E1 CBX2 GLT8D1 TRERF1 MFGE8 HBA-A1 HIST2H3C2 HNRPF SLC35A5 WBSCR18 AP4B1 CRKRS PRSS15 SRRM2 IHPK2 ABCC9 PDK3 HIST1H3C UBE2D3 ZFP263 TBC1D10C HIST1H3E POMT2 TEP1 SNRPE MECP2 RNUXA RAB14 UBB IRX3 SLC5A6 CKS2 PIAS2 GDF5 ESPL1 KCTD9 IPO13 POFUT1 LMBR1L C77668 INVS PPP1R1B SMARCAL1 EBF2 NRAS CDK7 WASF1 PRMT5 NPPC TIMM8A1 METAP2 PPAT HOXD8 HPCA HECW1 RPS5 STAR3 LRPAP1 TCERG1 SERTAD2 CLIC1 CHMP2A CAPZA2 SIM1 ADPRH TDG WRNIP1 SNRPB2 CACNG6 B230315F11RIK COX7A2 OXCT2B LHX6 D11ERTD730E DCLRE1B PCDH15 OAS2 EDG1 CD9 RGS2 NDUFAF1 PSMA7 UBE2T HIST2H2AA1 HIST1H1B CDCA8 ZFP715 SPO11 KLF3 PRDX1 ITGB8 ZFX1A REX2 RNASEH2A CDC16 D7WSU128E KCNS1 TUB MC HR1 BRCC3 A730008L03RIK 4930432O21RIK CUTL1 SS18L1 CSNK1G1 B3GALT6 NEB TGIF2 2810410C14RIK GIYD2 SLC45A3 2410193C02R K RANBP6 SLA2 TEGT UNC5A WWTR1 2610305D13RIK CCNE2 SERINC3 FBXO44 RLF LSP1 SLC36A2 ZFP397 COPG2 4933424A20RIK PHF6 CDX4 RWDD4A U2AF2 MCPT4 EIF3S3 X83328 NCOA2 PHF15 TBX2 FBXL21 BCL6B MUG1 OXCT2A PRPF18 SLC12A5 GSTZ1 SUZ12 GSPT2 UGP2 D1BWG0212E TSC22D4 OASL1 CYP4A12 RXRB ASNS LRP6 RPS27A DRAP1 DDAH2 FOSL1 SLC9A9 BET1L 5830417C01RIK SLC37A                                                                                                                                                                                                                                                                                                                                                                                                                                                                       |

2|MRPL37|KRT2-  
 1|PCOLN3|GRM7|A630042L2|RIK|RBMXRT|TOMM40|C330022B2|RIK|  
 FAH|SGIP1|SMAD1|ACTN4|PIGT|ZFP580|TCTE3|RHOX5|GYLTL1B|E2  
 F6|FKBP7|KLHL12|MTX1|ELF1|SECISBP2|OAZ1|WBP4|E2F8|CTNNA1|  
 BC012278|HIST1H3A|RHOX4E|RABEP2|MYNN|GAPDHS|DUSP3|CUL4  
 A|UBE3B|CDC25C|ADAMTS2|MUP1|CFTR|CLCN2|BAG5|HIST1H3H|A  
 PXL|PRKAG3|NPTX1|RPA3|B3GNT6|RHOX4A|CDC7|ATF7|CLN8|ATG9  
 A|RPS21|CACNG2|LAPTM5|SLC39A7|TXNRD2|CDK6|HIST1H2BM|KC  
 TD10|THBS3|PITPNM1|DIP3B|TSSK3|HYOU1|OFD1|EIF1|TARS|SNX4|P  
 EX16|TUBB3|PLA2G1B|RYR3|PIK3C2A|9030221C07RIK|SEC61G|CDC4  
 0|MAST2|GYS1|ILF3|PTPRK|COMMD1|GM711|MYT1L|ERCC2|UNC13B  
 |TSHZ3|MYH10|CAPZA1|EIF5|FBXO6B|HIST1H3D|USP3|PRKAR1A|BI  
 RC1C|BRWD1|MCPT2|CACNB2|UBE2E3|RG9MTD1|ADRA1D|SPCS1|S  
 LC27A3|C2TA|SRRM1|PHF10|HIST1H3F|USP43|HIST2H3C1|DCAMKL2  
 |PITPNC1|IGSF9|H2-  
 KE6|D11B|WG0434E|NPR2|IRX6|CHD4|ORC1L|NOL5A|PIAS3|CACNA1  
 E|GLIS2|STAMBP|NLN|FEM1A|VAX1|SPIN|ACTR2|MBD4|EDG2|IFNZ|  
 TWIST2|EPHB2|MRPL14|1700030G11RIK|ZBTB1|SMARCA5|ZBTB37|U  
 HMK1|ATP8B3|AMFR|PRPF31|MEI1|CYP3A25|PLD2|PGPEP1|GANC|A  
 VEN|COMT|CATSPER4|CLEC2D|BRMS1|RFC2|PLAT|FBXO38|PAPOL  
 G|MGAT3|BACE2|MID1IP1|BCAP31|NOTCH2|SLC26A9|CTCF|BTK|UB  
 QLN4|GUCY1B2|9130017K11RIK|PCSK4|SLC16A2|PKD2L2|4732466D1  
 7RIK|THPO|AP1M2|GOLGA4|4930429M06RIK|D230039L06RIK|ROR2|P  
 HKA2|ADSS|SLC35C1|ADAM23|C1RL|STC1|PIP5K2B|3230401101RIK|K  
 RAS|CNDP2|COL27A1|DPH5|STAG3|EIF3S4|OPN3|ZFP277|ARF3|MC1R|  
 CLASP1|MINA|UBTD1|DNAIC1|ABCD1|PRKCBP1|MAL|SOC2|HEMK  
 1|MRPL17|MMS19L|PIGQ|RUVBL2|RPL36|PCYT1A|PSMB5|BNIP2|DSC  
 AML1|POLR2H|RPS12|TM4SF4|GAG|DDX54|PIK3CB|TBX3|UBE2M|DB  
 NL|9030624G23RIK|PARS2|HIST2H2AA2|D1ERTD161E|THRAP5|NR2F  
 2|MYH13|MLH3|FHIT|E2F7|ID1|ELOVL2|HIST1H3B|FANCC|GYK|RBA  
 K|MEN1|KIF20A|C2|HLC5|GRIN2A|TXNL4B|SF3B2|TFPT|TARSL2|STK  
 38L|NKX2-  
 6|C1R|SYCP1|ZFP579|MTCP1|BLR1|RELB|ZDHHC7|PISD|VARS2|HIST1  
 H3G|RPS28|NDUFA7|HIST1H3I|FOXJ3|2400003N08RIK|NFE2L2|USP27  
 X|PTPRG|CEBPB|1700016G05RIK|ACTG1|STX6|PPP1R12B|SLC23A3|P  
 RDX2|DBF4|SLC39A4|TRAK1|HS2ST1|PPP1CA|NRXN2|APOA1|HIST2  
 H3B|PRKAB2|DDB2|LDLR

43170 3.46E-13 1.64E-10 316

6398 macromolecule  
 metabolism

CDK6|APOE|HIST1H2BM|FBXL14|ETF1|TSSK3|PLAGL2|HIST1H2BP|H  
 YOU1|RPO1-  
 1|EIF1|TARS|MCPT1|TUBB3|RBM4|2610031L17RIK|SIL1|BRD8|CDC40|  
 PJA1|MAST2|GYS1|MAST1|ILF3|PTPRK|MSC|PCSK1N|RG9MTD2|GM7  
 11|MYT1L|TSHZ3|ERCC2|CBX2|GLT8D1|HIST1H3D|FBXO6B|CAPZA1|  
 EIF5|TRERF1|USP3|PRKAR1A|HIST2H3C2|PRUNE|HNRPF|WBSCR18|B  
 RWD1|BIRC1C|CRKRS|PRSS15|MCPT2|SRRM2|RG9MTD1|UBE2E3|PD  
 K3|HIST1H3C|UBE2D3|ADRA1D|SPCS1|ZFP263|C2TA|SRRM1|HIST1H  
 3E|PHF10|POMT2|TEP1|HIST1H3F|SNRPE|USP43|MECP2|HIST2H3C1|D  
 CAMKL2|UBB|IRX3|D11B|WG0434E|PIAS2|NPR2|ESPL1|CHD4|IRX6|O  
 RC1L|PIAS3|NOL5A|NLN|STAMBP|GLIS2|POFUT1|FEM1A|VAX1|SPIN  
 |MBD4|EDG2|C77668|INVS|SMARCA1|EPHB2|TWIST2|EBF2|MRPL14|  
 CDK7|1700030G11RIK|ZBTB1|WASF1|PRMT5|SMARCA5|ZBTB37|UH  
 MK1|AMFR|TIMM8A1|PRPF31|METAP2|PLD2|HOXD8|PGPEP1|HECW  
 1|RPS5|GANC|LRPAP1|TCERG1|RFC2|PLAT|SERTAD2|CAPZA2|FBXO  
 38|PAPOLG|ADPRH|SIM1|TDG|WRNIP1|MGAT3|GGN|SNRPB2|BACE2|  
 MID1IP1|LHX6|NOTCH2|GALNT3|D1ERTD730E|CTCF|BTK|DCLRE1  
 B|UBQLN4|9130017K11RIK|OAS2|PCSK4|CD9|4732466D17RIK|NDUFA  
 F1|4930429M06RIK|PSMA7|ROR2|PHKA2|UBE2T|HIST2H2AA1|ADAM  
 23|C1RL|STC1|3230401101RIK|HIST1H1B|CNDP2|DPH5|ZFP715|SPO11|  
 EIF3S4|KLF3|OPN3|ZFHX1A|REX2|RNASEH2A|CLASP1|CDC16|D7WS  
 U128E|UBTD1|BRCC3|A730008L03RIK|4930432O21RIK|CUTL1|SS18L1  
 |CSNK1G1|B3GALT6|PRKCBP1|TGIF2|GIYD2|MAL|SLA2|WWTR1|HE  
 MK1|MRPL17|CCNE2|2610305D13RIK|MMS19L|FBXO44|RLF|RUVBL2|  
 PIGQ|RPL36|ZFP397|4933424A20RIK|PHF6|PSMB5|CDX4|RWBDD  
 4A|TM4SF4|MCPT4|U2AF2|EIF3S3|GAG|X83328|NCOA2|TBX2|PHF15|B  
 CL6B|FBXL21|DDX54|PRPF18|OXCT2A|TBX3|SUZ12|GSPT2|MAGI1|U  
 GP2|UBE2M|9030624G23RIK|PARS2|HIST2H2AA2|TSC22D4|D1ERTD1  
 61E|OASL1|THRAP5|NR2F2|MLH3|RXRB|FHIT|E2F7|RPS27A|FOSL1|D  
 RAP1|MRPL37|PCOLN3|A630042L2|RIK|RBMXRT|HIST1H3B|FANCC|  
 GYK|RBAK|MEN1|C330022B21RIK|C2|FAH|SGIP1|HLC5|PIGT|SMAD1|  
 ZFP580|TXNL4B|SF3B2|D5ERTD593E|RHOX5|GYLTL1B|E2F6|FKBP7|T  
 ARSL2|KLHL12|STK38L|ELF1|NKX2-  
 6|C1R|SECISBP2|SYCP1|WBP4|ZFP579|E2F8|RELB|CTNNA1|BC012278|

|       |          |          |     |      |                                                                                                                                                                                                                                                                                                    |                                                                                                                                                                                                                                                                                                                                                                                                                                                                                                                                                                                                                                                                                                                                                                                                                                                                                                                                                                                                                                                                                                                                                                                                                                                                                                                                                                                                                                                                                                                                                                                                                                                                                                                                                                                                                                                                                                                                                                                                                                                                                                                                                                                                                                                                                                                                                                                                                     |
|-------|----------|----------|-----|------|----------------------------------------------------------------------------------------------------------------------------------------------------------------------------------------------------------------------------------------------------------------------------------------------------|---------------------------------------------------------------------------------------------------------------------------------------------------------------------------------------------------------------------------------------------------------------------------------------------------------------------------------------------------------------------------------------------------------------------------------------------------------------------------------------------------------------------------------------------------------------------------------------------------------------------------------------------------------------------------------------------------------------------------------------------------------------------------------------------------------------------------------------------------------------------------------------------------------------------------------------------------------------------------------------------------------------------------------------------------------------------------------------------------------------------------------------------------------------------------------------------------------------------------------------------------------------------------------------------------------------------------------------------------------------------------------------------------------------------------------------------------------------------------------------------------------------------------------------------------------------------------------------------------------------------------------------------------------------------------------------------------------------------------------------------------------------------------------------------------------------------------------------------------------------------------------------------------------------------------------------------------------------------------------------------------------------------------------------------------------------------------------------------------------------------------------------------------------------------------------------------------------------------------------------------------------------------------------------------------------------------------------------------------------------------------------------------------------------------|
|       |          |          |     |      | <p>HIST1H3A ZDHHC7 RHOX4E VARS2 HIST1H3G RPS28 MYNN GAPDHS DUSP3 HIST1H3I UBE3B CUL4A CDC25C ADAMTS2 BAG5 FOXJ3 2400003N08RIK NFE2L2 USP27X PTPRG HIST1H3H CEBPB 1700016G05RIK PRKAG3 PPP1R12B RPA3 B3GNT6 RHOX4A DBF4 CDC7 TRAK1 HS2ST1 ATF7 PPP1CA CLN8 ATG9A APOA1 HIST2H3B RPS21 DDB2 LTLR</p> |                                                                                                                                                                                                                                                                                                                                                                                                                                                                                                                                                                                                                                                                                                                                                                                                                                                                                                                                                                                                                                                                                                                                                                                                                                                                                                                                                                                                                                                                                                                                                                                                                                                                                                                                                                                                                                                                                                                                                                                                                                                                                                                                                                                                                                                                                                                                                                                                                     |
| 44238 | 1.97E-12 | 7.00E-10 | 347 | 7320 | primary metabolism                                                                                                                                                                                                                                                                                 | <p>CDK6 APOE HIST1H2BM FBXL14 ETF1 TSSK3 PLAGL2 HIST1H2BP HYOU1 RPO1-1 EIF1 TARS MCPT1 TUBB3 KYNU PLA2G1B RBM4 PIK3C2A 2610031L17RIK SIL1 FDPS BRD8 CDC40 PJA1 MAST2 GYS1 MAST1 ILF3 PTPRK MSC PCSK1N RG9MTD2 ATP6V1E1 MYT1L GM711 TSHZ3 ERCC2 CBX2 GLT8D1 HIST1H3D FBXO6B EIF5 CAPZA1 TRERF1 USP3 PRKAR1A HIST2H3C2 PRUNE HNRPF WBSCR18 BRWD1 BIRC1C CRKRS PRSS15 MCPT2 SRRM2 RG9MTD1 UBE2E3 PDK3 HIST1H3C UBE2D3 ADRA1D SPCS1 ZFP263 SLC27A3 C2TA SRRM1 HIST1H3E PHF10 POMT2 TEP1 HIST1H3F SNRPE USP43 MECP2 HIST2H3C1 DCAMKL2 UBB PITPNC1 IRX3 H2-KE6 D11BWG0434E PIAS2 NPR2 ESPL1 CHD4 IRX6 ORC1L PIAS3 NOL5A NLN STAMB POFUT1 GLIS2 FEM1A VAX1 SPIN MBD4 EDG2 C77668 INVS PPP1R1B SMARCAL1 EPHB2 TWIST2 EBF2 MRPL14 CDK7 1700030G11RIK WASF1 ZBTB1 PRMT5 NPPC SMARCA5 ZBTB37 UHMK1 ATP8B3 AMFR TIMM8A1 PRPF31 PPAT METAP2 PLD2 HPCA HOXD8 PGPEP1 RPS5 HECW1 GANC STARD3 COMT LRPAP1 TCERG1 RFC2 PLAT SERTAD2 CAPZA2 FBXO38 PAPOLG WRNIP1 TDG ADPRH SIM1 MGAT3 GGN SNRPB2 BACE2 MID1P1 LHX6 NOTCH2 GALNT3 D11ERTD730E CTCF BTK DCLRE1B UBQLN4 GUCY1B2 9130017K11RIK OAS2 PCSK4 CD9 4732466D17RIK NDUFAF1 4930429M06RIK PSMA7 ROR2 PHKA2 ADSS UBE2T HIST2H2AA1 ADAM23 C1RL STC1 PIP5K2B 3230401H01RIK HIST1H1B CNDP2 SPO11 ZFP715 DPH5 EIF3S4 KLF3 OPN3 ITGB8 ZFX1A REX2 RNASEH2A CLASP1 CDC16 D7WSU128E UBTD1 BRCC3 A730008L03RIK 4930432O21RIK CUTL1 SS18L1 CSNK1G1 B3GALT6 PRKCBP1 NEB TGIF2 GIYD2 MAL SLA2 WWTR1 HEMK1 MRPL17 CCNE2 2610305D13RIK MMS19L FBXO44 RLF RUUBL2 PIGQ RPL36 ZFP397 PCYT1A COPG2 4933424A20RIK PHF6 PSMB5 CDX4 POLR2H RPS12 RWDD4A TM4SF4 MCPT4 U2AF2 EIF3S3 GAG X83328 NCOA2 TBX2 PHF15 BCL6B FBXL21 DDX54 PRPF428 OXCT2A GSTZ1 TBX3 SUZ12 GSPT2 MAGI1 UGP2 UBE2M 9030624G23RIK PARS2 HIST2H2AA2 TSC22D4 D1ERTD161E OASL1 THRAP5 NR2F2 MLH3 RXRB ASNS FHIT E2F7 RPS27A FOSL1 DDAH2 DRAP1 IDI1 ELOVL2 MIRPL37 PCOLN3 A630042L21RIK RBMXRT HIST1H3B FANCC GYK RBAK MEN1 C330022B21RIK C2FAH SGIP1 HLCS PIGT SMAD1 ZFP580 TXNL4B SF3B2 D5ERTD593E RHOX5 GYLTL1B E2F6 FKBP7 TARSL2 KLHL12 STK38L ELF1 NKX2-6 C1R SECISBP2 SYCP1 WBP4 OAZ1 ZFP579 E2F8 RELB CTNNA1 BCO12278 HIST1H3A ZDHHC7 RHOX4E PISD VARS2 HIST1H3G RPS28 MYNN GAPDHS DUSP3 HIST1H3I UBE3B CUL4A CDC25C ADAMTS2 BAG5 FOXJ3 2400003N08RIK NFE2L2 USP27X PTPRG HIST1H3H CEBPB 1700016G05RIK PRKAG3 PPP1R12B RPA3 B3GNT6 RHOX4A DBF4 CDC7 TRAK1 HS2ST1 ATF7 PPP1CA CLN8 ATG9A APOA1 HIST2H3B RPS21 PRKAB2 DDB2 LTLR</p> |
| 44237 | 8.17E-12 | 2.33E-09 | 354 | 7581 | cellular metabolism                                                                                                                                                                                                                                                                                | <p>CDK6 APOE HIST1H2BM FBXL14 ETF1 TSSK3 PLAGL2 HIST1H2BP HYOU1 RPO1-1 EIF1 TARS MCPT1 TUBB3 KYNU PLA2G1B RBM4 PIK3C2A 2610031L17RIK SIL1 FDPS BRD8 CDC40 PJA1 MAST2 GYS1 MAST1 ILF3 PTPRK MSC PCSK1N RG9MTD2 ATP6V1E1 MYT1L GM711 TSHZ3 ERCC2 CBX2 GLT8D1 HIST1H3D FBXO6B EIF5 CAPZA1 TRERF1 USP3 PRKAR1A HIST2H3C2 HNRPF WBSCR18 BRWD1 BIRC1C CRKRS PRSS15 MCPT2 SRRM2 RG9MTD1 UBE2E3 PDK3 HIST1H3C UBE2D3 ADRA1D SPCS1 ZFP263 SLC27A3 C2TA SRRM1 HIST1H3E TEP1 PHF10 POMT2 HIST1H3F SNRPE USP43 MECP2 HIST2H3C1 DCAMKL2 UBB PITPNC1 IRX3 H2-KE6 D11BWG0434E PIAS2 NPR2 ESPL1 CHD4 IRX6 ORC1L PIAS3 NOL5A NLN STAMB POFUT1 GLIS2 FEM1A VAX1 SPIN MBD4 EDG2 C77668 INVS PPP1R1B SMARCAL1 EPHB2 TWIST2 EBF2 MRPL14 CDK7 1700030G11RIK WASF1 ZBTB1 PRMT5 NPPC SMARCA5 ZBTB37 UHMK1 ATP8B3 AMFR TIMM8A1 CYP3A25 PRPF31 PPAT METAP2 PLD2 HPCA HOXD8 PGPEP1 RPS5 HECW1 GANC STARD3 COMT LRPAP1 TCERG1 RFC2 PLAT SERTAD2 CAPZA2 FBXO38 PAPOLG WRNIP1 TDG ADPRH SIM1 MGAT3 SNRPB2 BACE2 MID1P1 COX7A2 LHX6 OXCT2B NOTCH2 D11ERTD730E CTCF BTK DCLRE1B UBQLN4 GUCY1B2 9130017K11RIK OAS2 PCSK4 4732466D17RIK NDUFAF1 4930429M</p>                                                                                                                                                                                                                                                                                                                                                                                                                                                                                                                                                                                                                                                                                                                                                                                                                                                                                                                                                                                                                                                                                                                                                                                                                                                                                          |

8152 2.00E-10 4.74E-08 367 8104 metabolism

06RIK|PSMA7|ROR2|PHKA2|ADSS|UBE2T|HIST2H2AA1|ADAM23|C1R  
L|STC1|PIP5K2B|3230401I01RIK|HIST1H1B|CNDP2|SPO11|ZFP715|DPH  
5|EIF3S4|KLF3|OPN3|PRDX1|ZFP277|ITGB8|ZFHX1A|MC1R|REX2|RNA  
SEH2A|CLASP1|CDC16|D7WSU128E|UBTD1|BRCC3|MCHR1|A730008L  
03RIK|4930432O21RIK|CUTL1|SS18L1|CSNK1G1|B3GALT6|PRKCBP1|  
NEB|2810410C14RIK|TGIF2|GIYD2|MAL|SLA2|WWTR1|HEMK1|MRPL  
17|CCNE2|2610305D13RIK|MMS19L|FBXO44|RLF|RUUBL2|PIGQ|RPL3  
6|ZFP397|PCYT1A|COPG2|4933424A20RIK|PHF6|PSMB5|CDX4|POLR2  
H|RPS12|RWDD4A|TM4SF4|MCPT4|U2AF2|EIF3S3|GAG|X83328|NCOA  
2|TBX2|PHF15|BCL6B|FBXL21|DDX54|MUG1|PRPF18|OXCT2A|GSTZ1|  
TBX3|SUZ12|GSPT2|UGP2|UBE2M|9030624G23RIK|PARS2|HIST2H2A  
A2|TSC22D4|D1ERTD161E|OASL1|CYP4A12|THRAP5|NR2F2|MLH3|RX  
RB|ASNS|FHIT|E2F7|RPS27A|FOSL1|DDAH2|DRAP1|IDI1|SLC37A2|EL  
OVL2|MRPL37|PCOLN3|A630042L21RIK|RBMXRT|HIST1H3B|FANCC|  
GYK|RBAK|MEN1|C330022B21RIK|C2|FAH|SGIP1|HLCS|PIGT|SMAD1|  
ZFP580|TXNL4B|SF3B2|RHOX5|GYLTL1B|E2F6|FKBP7|TARSL2|KLHL  
12|STK38L|ELF1|NKX2-

6|C1R|SECISBP2|SYCP1|WBP4|OAZ1|ZFP579|E2F8|RELB|BC012278|HIS  
T1H3A|ZDHHC7|RHOX4E|PISD|VARS2|HIST1H3G|RPS28|MYNN|GAP  
DHS|NDUFA7|DUSP3|HIST1H3I|UBE3B|CUL4A|CDC25C|ADAMTS2|B  
AG5|FOXJ3|2400003N08RIK|NFE2L2|USP27X|PTPRG|HIST1H3H|CEBP  
B|1700016G05RIK|PRKAG3|PPP1R12B|PRDX2|RPA3|B3GNT6|RHOX4A  
|DBF4|CDC7|TRAK1|HS2ST1|ATF7|PPP1CA|CLN8|ATG9A|APOA1|HIST  
2H3B|RPS21|PRKAB2|DDB2|LDLR|TXNRD2

CDK6|APOE|HIST1H2BM|FBXL14|ETF1|TSSK3|PLAGL2|HIST1H2BP|H  
YOU1|RPO1-  
1|EIF1|TARS|MCPT1|TUBB3|KYNUL|PLA2G1B|RBM4|PIK3C2A|2610031  
L17RIK|SIL1|FDPS|BRD8|CDC40|PJA1|MAST2|GYS1|MAST1|ILF3|PTP  
RK|MSC|PCSK1N|RG9MTD2|ATP6V1E1|MYT1L|GM711|TSHZ3|ERCC2|  
CBX2|GLT8D1|HIST1H3D|FBXO6B|EIF5|CAPZA1|TRERF1|USP3|PRKA  
R1A|HIST2H3C2|PRUNE|HNRPF|WBSR18|BRWD1|BIRC1C|PRSS15|C  
RKRS|MCPT2|SRRM2|RG9MTD1|UBE2E3|PDK3|HIST1H3C|UBE2D3|A  
DRA1D|SPCS1|ZFP263|HSDL2|SLC27A3|C2TA|SRRM1|HIST1H3E|TEP1  
|POMT2|PHF10|HIST1H3F|SNRPE|USP43|MECP2|HIST2H3C1|DCAMKL  
2|UBB|PITPNC1|ALDH7A1|IRX3|H2-  
KE6|NPL|D11BWG0434E|PIAS2|NPR2|ESPL1|CHD4|IRX6|ORC1L|PIAS3  
|NOL5A|NLN|STAMB|POFUT1|GLIS2|FEM1A|VAX1|SPIN|MBD4|EDG  
2|C77668|INVS|PPP1R1B|SMARCA1|EPHB2|TWIST2|EBF2|MRPL14|C  
DK7|1700030G11RIK|WASF1|ZBTB1|PRMT5|NPPC|SMARCA5|ZBTB37|  
UHMK1|ATP8B3|AMFR|TIMM8A1|CYP3A25|PRPF31|PPAT|METAP2|P  
LD2|HPCA|HOXD8|PGPEP1|RPS5|HECW1|GANC|STARD3|COMT|LRP  
AP1|TCERG1|RFC2|PLAT|SERTAD2|CAPZA2|FBXO38|PAPOLG|WRNI  
P1|TDG|ADPRH|SIM1|MGAT3|GGN|SNRPB2|BACE2|MID1P1|COX7A2|  
LHX6|OXCT2B|NOTCH2|GALNT3|D11ERTD730E|CTCF|BTK|DCLRE1  
B|UBQLN4|GUCY1B2|9130017K11RIK|OAS2|PCSK4|CD9|4732466D17R  
IK|NDUFAF1|4930429M06RIK|PSMA7|ROR2|PHKA2|ADSS|UBE2T|HIS  
T2H2AA1|ADAM23|C1RL|STC1|PIP5K2B|3230401I01RIK|HIST1H1B|CN  
DP2|SPO11|ZFP715|DPH5|EIF3S4|KLF3|OPN3|PRDX1|ZFP277|ITGB8|ZF  
HX1A|MC1R|REX2|RNASEH2A|CLASP1|CDC16|D7WSU128E|UBTD1|B  
RCC3|MCHR1|A730008L03RIK|BC052066|4930432O21RIK|CUTL1|SS18  
L1|CSNK1G1|B3GALT6|PRKCBP1|NEB|2810410C14RIK|TGIF2|GIYD2|  
MAL|SLA2|WWTR1|HEMK1|MRPL17|CCNE2|2610305D13RIK|MMS19L  
|FBXO44|RLF|RUUBL2|PIGQ|RPL36|ZFP397|PCYT1A|COPG2|4933424A  
20RIK|PHF6|PSMB5|CDX4|POLR2H|RPS12|RWDD4A|TM4SF4|AF39701  
4|MCPT4|U2AF2|EIF3S3|GAG|X83328|NCOA2|TBX2|PHF15|BCL6B|FBX  
L21|DDX54|MUG1|PRPF18|OXCT2A|GSTZ1|TBX3|SUZ12|GSPT2|MAGI  
1|UGP2|UBE2M|9030624G23RIK|PARS2|HIST2H2AA2|TSC22D4|D1ERT  
D161E|OASL1|CYP4A12|THRAP5|NR2F2|MLH3|RXRB|ASNS|FHIT|E2F  
7|RPS27A|FOSL1|DDAH2|DRAP1|IDI1|SLC37A2|ELOVL2|MRPL37|PCO  
LN3|A630042L21RIK|RBMXRT|HIST1H3B|FANCC|GYK|RBAK|MEN1|  
C330022B21RIK|C2|FAH|SGIP1|HLCS|PIGT|SMAD1|ZFP580|TXNL4B|S  
F3B2|D5ERTD593E|RHOX5|GYLTL1B|E2F6|FKBP7|TARSL2|KLHL12|S  
TK38L|ELF1|NKX2-  
6|C1R|SECISBP2|SYCP1|WBP4|OAZ1|ZFP579|E2F8|RELB|CTNNA1|BC0  
12278|HIST1H3A|ZDHHC7|RHOX4E|PISD|VARS2|HIST1H3G|RPS28|M  
YNN|GAPDHS|NDUFA7|DUSP3|HIST1H3I|UBE3B|CUL4A|CDC25C|AD  
AMTS2|BAG5|FOXJ3|2400003N08RIK|NFE2L2|USP27X|PTPRG|HIST1H  
3H|CEBPB|1700016G05RIK|PRKAG3|PPP1R12B|PRDX2|RPA3|B3GNT6|  
RHOX4A|DBF4|CDC7|TRAK1|HS2ST1|ATF7|PPP1CA|SMPDL3A|CLN8|  
ATG9A|APOA1|HIST2H3B|RPS21|PRKAB2|DDB2|LDLR|TXNRD2

|       |          |          |     |      |                                                                |                                                                                                                                                                                                                                                                                                                                                                                                                                                                                                                                                                                                                                                                                                                                                                                                                                                                                                                                                                                                                                                                                                                                                                                                                                                                                                                                             |
|-------|----------|----------|-----|------|----------------------------------------------------------------|---------------------------------------------------------------------------------------------------------------------------------------------------------------------------------------------------------------------------------------------------------------------------------------------------------------------------------------------------------------------------------------------------------------------------------------------------------------------------------------------------------------------------------------------------------------------------------------------------------------------------------------------------------------------------------------------------------------------------------------------------------------------------------------------------------------------------------------------------------------------------------------------------------------------------------------------------------------------------------------------------------------------------------------------------------------------------------------------------------------------------------------------------------------------------------------------------------------------------------------------------------------------------------------------------------------------------------------------|
| 6139  | 1.49E-09 | 3.02E-07 | 186 | 3458 | nucleobase, nucleoside, nucleotide and nucleic acid metabolism | ADSS HIST2H2AA1 3230401 H01RIK HIST1H2BM HIST1H1B SPO11 ZFP715 KLF3 PLAGL2 HIST1H2BP RPO1-1 ZFXH1A REX2 RNASEH2A TARS A730008L03RIK 4930432O21RIK K YNU CUTL1 SS18L1 RBM4 PRKCBP1 2610031L17RIK TGIF2 GIYD2 B RD8 MAL SLA2 CDC40 WWTR1 HEMK1 ILF3 CCNE2 2610305D13RIK  MMS19L MSC RLF RG9MTD2 ATP6V1E1 MYT1L RUVBL2 TSHZ3 ER CC2 ZFP397 CBX2 HIST1H3D PHF6 TRERF1 CDX4 POLR2H U2AF2 PR KAR1A HIST2H3C2 GAG HNRPF NCOA2 BRWD1 BIRC1C TBX2 PHF1 5 BCL6B DDX54 SRRM2 PRPF18 RG9MTD1 HIST1H3C ADRA1D TBX3  ZFP263 SUZ12 C2TA UGP2 9030624G23RIK PARS2 HIST2H2AA2 TSC2 2D4 D1ERTD161E SRRM1 HIST1H3E THRAP5 TEP1 PHF10 NR2F2 HIS T1H3F MLH3 SNRPE RXRB MECP2 HIST2H3C1 FHIT E2F7 IRX3 FOSL 1 DRAP1 PIAS2 NPR2 CHD4 IRX6 ORC1L PIAS3 NOL5A PCOLN3 POF UT1 GLIS2 A630042L21RIK FEM1A RBMXRT HIST1H3B VAX1 FANC C RBAK MEN1 SPIN MBD4 EDG2 C77668 C330022B21RIK INVS FAH P PP1R1B SGIP1 SMARCAL1 TWIST2 EBF2 SMAD1 ZFP580 CDK7 TXNL 4B SF3B2 ZBTB1 RHOX5 PRMT5 E2F6 NPPC SMARCA5 TARSL2 ZBT B37 ELF1 NKX2-6 PRPF31 SYCP1 WBP4 PPAT ZFP579 E2F8 HOXD8 RELB BC012278 HI ST1H3A RHOX4E VARS2 HIST1H3G MYNN TCERG1 RFC2 HIST1H3I  CUL4A SERTAD2 PAPOLG WRNIP1 TDG SIM1 FOXJ3 2400003N08RIK  NFE2L2 SNRPB2 HIST1H3H CEBPB LHX6 PPP1R12B NOTCH2 D11ER TD730E CTCF DCLRE1B RPA3 RHOX4A DBF4 CDC7 TRAK1 GUCY1B 2 ATF7 OAS2 HIST2H3B 4930429M06RIK DDB2 ROR2 |
| 6259  | 1.84E-08 | 3.27E-06 | 57  | 716  | DNA metabolism                                                 | HIST2H2AA1 HIST1H2BM HIST1H1B CHD4 ORC1L SPO11 HIST1H3B  HIST1H2BP FANCC MEN1 RNASEH2A MBD4 SMARCAL1 SGIP1 PRM T5 SMARCA5 GIYD2 BRD8 ELF1 SYCP1 HEMK1 CCNE2 MMS19L RU VBL2 HIST1H3A ERCC2 CBX2 HIST1H3D HIST1H3G RFC2 HIST1H3I  CUL4A HIST2H3C2 GAG BIRC1C TDG WRNIP1 2400003N08RIK HIST1 H3C ADRA1D SUZ12 HIST1H3H HIST2H2AA2 CTCF DCLRE1B HIST1 H3E RPA3 DBF4 TEP1 CDC7 HIST1H3F MLH3 HIST2H3C1 HIST2H3B 4 930429M06RIK FHIT DDB2                                                                                                                                                                                                                                                                                                                                                                                                                                                                                                                                                                                                                                                                                                                                                                                                                                                                                                         |
| 6334  | 1.67E-06 | 2.65E-04 | 17  | 121  | nucleosome assembly                                            | HIST1H3H HIST2H2AA1 HIST1H3D HIST1H3G HIST1H2BM HIST1H1 B HIST2H2AA2 HIST1H3I HIST1H3E HIST2H3C2 HIST1H3F HIST1H3B  HIST1H2BP HIST2H3C1 HIST2H3B HIST1H3C HIST1H3A                                                                                                                                                                                                                                                                                                                                                                                                                                                                                                                                                                                                                                                                                                                                                                                                                                                                                                                                                                                                                                                                                                                                                                          |
| 19538 | 1.92E-06 | 2.73E-04 | 174 | 3502 | protein metabolism                                             | UBE2T HIST2H2AA1 ADAM23 C1RL STC1 CDK6 APOE 3230401 H01RI K HIST1H2BM HIST1H1B CNDP2 DPH5 FBXL14 EIF3S4 ETF1 OPN3 TS SK3 HIST1H2BP HYOU1 EIF1 CLASP1 TARS MCPT1 CDC16 D7WSU12 8E UBTD1 BRCC3 TUBB3 CSNK1G1 B3GALT6 2610031L17RIK SIL1 PJ A1 MAST2 HEMK1 MAST1 MRPL17 ILF3 PTPRK PCSK1N FBXO44 RIF GM711 RUVBL2 PIGQ RPL36 4933424A20RIK HIST1H3D FBXO6B EIF 5 CAPZA1 PSMB5 RPS12 RWDD4A USP3 TM4SF4 MCPT4 PRKAR1A  EIF3S3 HIST2H3C2 GAG X83328 WBSCR18 PRSS15 CRKRS FBXL21 M CPT2 UBE2E3 PDK3 HIST1H3C UBE2D3 SPCS1 SUZ12 GSP2 MAG1  UBE2M PARS2 HIST2H2AA2 OASL1 HIST1H3E TEP1 POMT2 HIST1H3 F USP43 HIST2H3C1 DCAMKL2 UBB RPS27A D11BWG0434E PIAS2 N PR2 ESPL1 PIAS3 MRPL37 NLN STAMBIP POFUT1 HIST1H3B FANCC  MEN1 C2 EPHB2 HLCS PIGT SMAD1 MRPL14 CDK7 1700030G11RIK  WASF1 PRMT5 FKBP7 TARSL2 UHMK1 KLHL12 STK38L AMFR ELF1  C1R TIMM8A1 SECISBP2 METAP2 PLD2 PGPEP1 RPS5 HECW1 CTNN A1 HIST1H3A ZDHC7 VARS2 HIST1H3G LRPAP1 RPS28 DUSP3 HIS T1H3I PLAT UBE3B CUL4A CDC25C ADAMTS2 CAPZA2 FBXO38 AD PRH BAG5 MGAT3 GGN USP27X PTPRG HIST1H3H CEBPB BACE2 MI D1IP1 1700016G05RIK D11ERTD730E BTK B3GNT6 UBQLN4 CDC7 TR AK1 HS2ST1 9130017K11RIK PCSK4 PPP1CA CLN8 CD9 4732466D17RI K ATG9A APOA1 HIST2H3B RPS21 NDUFAF1 PSMA7 LDLR ROR2 PH KA2                                                                                          |
| 6333  | 5.57E-06 | 7.21E-04 | 20  | 175  | chromatin assembly or disassembly                              | HIST1H3H HIST2H2AA1 CBX2 HIST1H3D HIST1H3G HIST1H2BM HIS T1H1B HIST2H2AA2 CHD4 HIST1H3I SMARCA5 HIST1H3E HIST2H3C 2 HIST1H3F HIST1H3B HIST1H2BP HIST2H3C1 HIST2H3B HIST1H3C  HIST1H3A                                                                                                                                                                                                                                                                                                                                                                                                                                                                                                                                                                                                                                                                                                                                                                                                                                                                                                                                                                                                                                                                                                                                                       |
| 31497 | 8.46E-06 | 1.00E-03 | 17  | 136  | chromatin assembly                                             | HIST1H3H HIST2H2AA1 HIST1H3D HIST1H3G HIST1H2BM HIST1H1 B HIST2H2AA2 HIST1H3I HIST1H3E HIST2H3C2 HIST1H3F HIST1H3B  HIST1H2BP HIST2H3C1 HIST2H3B HIST1H3C HIST1H3A                                                                                                                                                                                                                                                                                                                                                                                                                                                                                                                                                                                                                                                                                                                                                                                                                                                                                                                                                                                                                                                                                                                                                                          |
| 6461  | 1.25E-05 | 1.37E-03 | 28  | 316  | protein complex assembly                                       | HIST2H2AA1 HIST1H3D HIST1H3G APOE HIST1H2BM HIST1H1B HIS T1H3I HIST2H3C2 CAPZA2 HIST1H3B HIST1H2BP FANCC GGN HIST 1H3C HIST1H3H MAG1 WASF1 HIST2H2AA2 D11ERTD730E 2610031 L17RIK HIST1H3E HIST1H3F CD9 HIST2H3C1 HIST2H3B NDUFAF1 C                                                                                                                                                                                                                                                                                                                                                                                                                                                                                                                                                                                                                                                                                                                                                                                                                                                                                                                                                                                                                                                                                                         |

TNNA1|HIST1H3A

|       |          |          |     |      |                                                            |                                                                                                                                                                                                                                                                                                                                                                                                                                                                                                                                                                                                                                                                                                                                                                                                                                                                                                                                                                                                                                                                                                                               |
|-------|----------|----------|-----|------|------------------------------------------------------------|-------------------------------------------------------------------------------------------------------------------------------------------------------------------------------------------------------------------------------------------------------------------------------------------------------------------------------------------------------------------------------------------------------------------------------------------------------------------------------------------------------------------------------------------------------------------------------------------------------------------------------------------------------------------------------------------------------------------------------------------------------------------------------------------------------------------------------------------------------------------------------------------------------------------------------------------------------------------------------------------------------------------------------------------------------------------------------------------------------------------------------|
| 16070 | 5.07E-05 | 5.15E-03 | 130 | 2603 | RNA metabolism                                             | 3230401I01RIK ZFP715 KLF3 PLAGL2 RPO1-1 ZFH1A REX2 RNASEH2A TARS A730008L03RIK 4930432O21RIK CUTL1 SS18L1 RBM4 PRKCBP1 2610031L17RIK TGIF2 BRD8 MAL SLA2 CDC40 WWTR1 ILF3 2610305D13RIK MMS19L MSC RG9MTD2 MYT1L TSHZ3 ERCC2 ZFP397 CBX2 PHF6 TRERF1 CDX4 PRKAR1A U2AF2 HNRPF NCOA2 BRWD1 BIRC1C PHF15 TBX2 BCL6B DDX54 SRRM2 PRPF18 RG9MTD1 TBX3 SUZ12 ZFP263 C2TA UGP2 9030624G23RIK PARS2 D1ERTD161E TSC22D4 SRRM1 THRAP5 PHF10 NR2F2 SNRPE RXRB MECP2 E2F7 IRX3 DRAP1 FOSL1 PIAS2 CHD4 IRX6 PIAS3 NOL5A PCOLN3 GLIS2 FEM1A A630042L21RIK RBMXRT VAX1 RBAK SPIN EDG2 C77668 INVS C330022B21RIK FAH TWIST2 EBF2 SMAD1 CDK7 TXNL4B ZFP580 SF3B2 ZBTB1 RHOX5 PRMT5 E2F6 TARSL2 ZBTB37 ELF1 NKX2-6 PRPF31 WBP4 ZFP579 E2F8 HOXD8 RELB BC012278 RHOX4E VAR52 MYNN TCERG1 SERTAD2 PAPOLG SIM1 FOXJ3 2400003N08RIK NFE2L2 SNRPB2 CEBPB LHX6 PPP1R12B NOTCH2 D11ERTD730E CTCF RHOX4A TRAK1 ATF7 OAS2 ROR2                                                                                                                                                                                                                          |
| 7143  | 5.46E-05 | 5.18E-03 | 4   | 7    | female meiosis                                             | STAG3 PPP1CA MLH3 SPIN                                                                                                                                                                                                                                                                                                                                                                                                                                                                                                                                                                                                                                                                                                                                                                                                                                                                                                                                                                                                                                                                                                        |
| 6325  | 6.80E-05 | 6.05E-03 | 26  | 311  | establishment and/or maintenance of chromatin architecture | HIST2H2AA1 CBX2 HIST1H3D HIST1H3G HIST1H2BM HIST1H1B CHD4 HIST1H3I HIST2H3C2 HIST1H2BP HIST1H3B MEN1 2400003N08RIK HIST1H3C HIST1H3H SUZ12 SMARCAL1 PRMT5 HIST2H2AA2 HIST1H3E SMARCA5 BRD8 HIST1H3F HIST2H3C1 HIST2H3B HIST1H3A                                                                                                                                                                                                                                                                                                                                                                                                                                                                                                                                                                                                                                                                                                                                                                                                                                                                                               |
| 6464  | 8.07E-05 | 6.75E-03 | 85  | 1561 | protein modification                                       | UBE2T STC1 RPS27A CDK6 PIAS2 NPR2 PIAS3 DPH5 FBXL14 STAMBPIP POFUT1 OPN3 TSSK3 MEN1 CDC16 D7WSU128E UBTD1 BRCC3 EPHB2 HLCS PIGT SMAD1 CSNK1G1 CDK7 1700030G11RIK PRMT5 B3GALT6 UHMK1 KLLHL12 STK38L AMFR ELF1 PJA1 MAST2 HEMK1 MAST1 ILF3 PTPRK FBXO44 PCSK1N HECW1 GM711 PIGQ ZDHHC7 4933424A20RIK FBXO6B RWDD4A USP3 TM4SF4 DUSP3 PLAT UBE3B CUL4A PRKAR1A CDC25C CRKRS FBXL21 FBXO38 ADPRH MGAT3 UBE2E3 PDK3 PTPRG UBE2D3 SPCS1 SUZ12 BACE2 UBE2M BTK OASL1 B3GNT6 UBQLN4 CDC7 TEP1 POMT2 TRAK1 9130017K11RIK PPP1CA USP43 ATG9A DCAMKL2 UBB LDLR ROR2 PHKA2                                                                                                                                                                                                                                                                                                                                                                                                                                                                                                                                                               |
| 50791 | 1.05E-04 | 8.13E-03 | 171 | 3666 | regulation of physiological process                        | CDK6 APOE KRAS ZFP715 EIF3S4 KLF3 OPN3 PRDX1 PLAGL2 ZFH1A REX2 CLASP1 MINA CDC16 A730008L03RIK 4930432O21RIK CUTL1 SS18L1 BGLAP-RS1 PRKCBP1 2610031L17RIK BGLAP2 TGIF2 BRD8 MAL TEGT SLA2 SOCS2 MAST2 WWTR1 ILF3 SERINC3 CCNE2 2610305D13RIK MMS19L MSC MYT1L TSHZ3 ERCC2 ZFP397 CBX2 PHF6 EIF5 CAPZA1 TRERF1 BNIP2 MFGE8 CDX4 TM4SF4 PRKAR1A NCOA2 BRWD1 BIRC1C TBX2 PHF15 BCL6B DDX54 IHPK2 PIK3CB UBE2E3 ADRA1D TBX3 SUZ12 ZFP263 GSP2 C2TA UGP2 9030624G23RIK TSC22D4 D1ERTD161E THRAP5 PHF10 TEP1 NR2F2 TNNT3 RXRB MECP2 E2F7 IRX3 FOSL1 DDAH2 DRAP1 CKS2 PIAS2 GDF5 ESPL1 CHD4 IRX6 PIAS3 GRM7 PCOLN3 STAMBPIP GLIS2 POFUT1 A630042L21RIK FEM1A VAX1 RBAK MEN1 SPIN MBD4 EDG2 C330022B21RIK INVS C2 FAH IFN2 EPHB2 TWIST2 EBF2 ACTN4 SMAD1 NRAS GRIN2A ZFP580 CDK7 ZBTB1 RHOX5 PRMT5 E2F6 NPPC TFPT BGLAP1 ZBTB37 UHMK1 STK38L ELF1 NKX2-6 C1R WBP4 ZFP579 E2F8 HPCA HOXD8 MTCP1 RELB CTNNA1 BC012278 AVEN RHOX4E CLEC2D MYNN GAPDHS BRMS1 TCERG1 CUL4A SERTAD2 CAPZA2 SIM1 WRNIP1 FOXJ3 2400003N08RIK NFE2L2 CEBPB MID1 P1 LHX6 PPP1R12B NOTCH2 CTCF BTK PRDX2 RHOX4A DBF4 CDC7 TRAK1 ATF7 PPP1CA EDG1 APOA1 THPO ROR2 |
| 6323  | 1.09E-04 | 8.13E-03 | 26  | 320  | DNA packaging                                              | HIST2H2AA1 CBX2 HIST1H3D HIST1H3G HIST1H2BM HIST1H1B CHD4 HIST1H3I HIST2H3C2 HIST1H2BP HIST1H3B MEN1 2400003N08RIK HIST1H3C HIST1H3H SUZ12 SMARCAL1 PRMT5 HIST2H2AA2 HIST1H3E SMARCA5 BRD8 HIST1H3F HIST2H3C1 HIST2H3B HIST1H3A                                                                                                                                                                                                                                                                                                                                                                                                                                                                                                                                                                                                                                                                                                                                                                                                                                                                                               |
| 50789 | 1.30E-04 | 9.28E-03 | 190 | 4166 | regulation of biological process                           | SPRED3 CDK6 APOE KRAS CHRD ZFP715 EIF3S4 KLF3 OPN3 PRDX1 PLAGL2 ZFH1A TMEM9B REX2 CLASP1 MINA CDC16 A730008L03RIK 4930432O21RIK CUTL1 SS18L1 BGLAP-RS1 PRKCBP1 2610031L17RIK TGIF2 BGLAP2 BRD8 MAL TEGT SLA2 SOCS2 MAST2 WWTR1 HEMK1 CHML ILF3 SERINC3 CCNE2 2610305D13RIK MMS19L MSC RLF D10ERTD610E MYT1L TSHZ3 ERCC2 ZFP397 CBX2 PHF6 EIF5 CAPZA1 TRERF1 BNIP2 MFGE8 CDX4 TM4SF4 P                                                                                                                                                                                                                                                                                                                                                                                                                                                                                                                                                                                                                                                                                                                                         |



|       |          |          |     |      |                                                                                                                                                                                                                                                                                                                                                                                                                                                                                                                                                                                                                                                                                                                                                                                                                                                                    |                                                                                                                                                                                                                                                                                                                                                                                                                                                                                                                                                                                                                                                                                                                                                                                                                                                                                                                                                                                                                                                                                                                                                   |
|-------|----------|----------|-----|------|--------------------------------------------------------------------------------------------------------------------------------------------------------------------------------------------------------------------------------------------------------------------------------------------------------------------------------------------------------------------------------------------------------------------------------------------------------------------------------------------------------------------------------------------------------------------------------------------------------------------------------------------------------------------------------------------------------------------------------------------------------------------------------------------------------------------------------------------------------------------|---------------------------------------------------------------------------------------------------------------------------------------------------------------------------------------------------------------------------------------------------------------------------------------------------------------------------------------------------------------------------------------------------------------------------------------------------------------------------------------------------------------------------------------------------------------------------------------------------------------------------------------------------------------------------------------------------------------------------------------------------------------------------------------------------------------------------------------------------------------------------------------------------------------------------------------------------------------------------------------------------------------------------------------------------------------------------------------------------------------------------------------------------|
|       |          |          |     |      | RKAR1A NCOA2 BRWD1 BIRC1C TBX2 PHF15 BCL6B DDX54 FARP2 IHPK2 PIK3CB UBE2E3 ADRA1D TBX3 SUZ12 ZFP263 GSPT2 C2TA MAGI1 UGP2 9030624G23RIK TSC22D4 D1ERTD161E THRAP5 TEP1 PHF10 NR2F2 TNNT3 RXRB MAPKBP1 MECP2 LRP6 E2F7 IRX3 FOSL1 DDAH2 DRAP1 CKS2 PIAS2 GDF5 ESPL1 CHD4 IRX6 STIP1 ATRN PIAS3 2600003E23RIK GRM7 PCOLN3 STAMB POFUT1 GLIS2 A630042L2 IRIK FEM1A VAX1 RBK MEN1 SPIN MBD4 EDG2 C330022B2 IRIK INVS C2 FAH PPP1R1B IFNZ EPHB2 TWIST2 EBF2 ACTN4 SMAD1 NRAS GRIN2A ZFP580 CDK7 ZBTB1 RHOX5 PRMT5 E2F6 NPPC TFPT BGLAP1 ZBTB37 UHMK1 RIC8 STK38L ELF1 NKX2-6 C1R WBP4 PLD2 ZFP579 E2F8 HPCA HOXD8 MTCP1 RELB CTNNA1 BC012278 AVEN RHOX4E CLEC2D GAPDHS MYNN BRMS1 TCERG1 CUL4A SERTAD2 CAPZA2 WRNIP1 SIM1 FOXJ3 2400003N08RIK NFE2L2 CEBPB MID1P1 LHX6 PPP1R12B NOTCH2 CTCF BTK PRDX2 RHOX4A DBF4 CDC7 TRAK1 ATF7 PPP1CA EDG1 CLN8 APOA1 THPO RGS2 ROR2 |                                                                                                                                                                                                                                                                                                                                                                                                                                                                                                                                                                                                                                                                                                                                                                                                                                                                                                                                                                                                                                                                                                                                                   |
| 43412 | 1.73E-04 | 1.17E-02 | 87  | 1643 | biopolymer modification                                                                                                                                                                                                                                                                                                                                                                                                                                                                                                                                                                                                                                                                                                                                                                                                                                            | UBE2T STC1 RPS27A CDK6 PIAS2 NPR2 PIAS3 DPH5 FBXL14 STAMB POFUT1 OPN3 TSSK3 MEN1 MBD4 CDC16 D7WSU128E UBTD1 BRC3 EPHB2 HLCS PIGT SMAD1 CSNK1G1 CDK7 1700030G11RIK PRMT5 B3GALT6 UHMK1 KLHL12 STK38L AMFR ELF1 PJA1 MAST2 HEMK1 MAST1 ILF3 PTPRK FBXO44 PCSK1N HECW1 GM711 PIGQ ZDHHHC7 4933424A20RIK FBXO6B RWDD4A USP3 TM4SF4 DUSP3 PLAT UBE3B CUL4A PRKAR1A CDC25C CRKRS FBXL21 FBXO38 ADPRH MGAT3 UBE2E3 PDK3 PTPRG UBE2D3 SPCS1 SUZ12 BACE2 UBE2M CTCF BTK OASL1 B3GNT6 UBQLN4 CDC7 TEP1 POMT2 TRAK1 9130017K11RIK PPP1CA USP43 ATG9A DCAMKL2 UBB LDLR ROR2 PHKA2                                                                                                                                                                                                                                                                                                                                                                                                                                                                                                                                                                             |
| 50794 | 1.86E-04 | 1.20E-02 | 173 | 3756 | regulation of cellular process                                                                                                                                                                                                                                                                                                                                                                                                                                                                                                                                                                                                                                                                                                                                                                                                                                     | SPRED3 CDK6 APOE KRAS CHRD ZFP715 EIF3S4 KLF3 PRDX1 PLAGL2 ZFHXA1 TMEM9B REX2 CLASP1 MINA CDC16 A730008L03RIK 4930432O21RIK CUTL1 SS18L1 PRKCBP1 2610031L17RIK TGIF2 BRD8 MAL TEGT SLA2 SOCS2 MAST2 WWTR1 ILF3 SERINC3 CCNE2 2610305D13RIK MMS19L MSC RLF D10ERTD610E MYT1L TSHZ3 ERCC2 ZFP397 CBX2 PHF6 EIF5 CAPZA1 TRERF1 BNIP2 MFGE8 CDX4 TM4SF4 PRKAR1A NCOA2 BRWD1 BIRC1C TBX2 PHF15 BCL6B DDX54 FARP2 IHPK2 PIK3CB UBE2E3 ADRA1D TBX3 SUZ12 ZFP263 GSPT2 C2TA MAGI1 UGP2 9030624G23RIK TSC22D4 D1ERTD161E THRAP5 PHF10 TEP1 NR2F2 RXRB MECP2 LRP6 E2F7 IRX3 FOSL1 DDAH2 DRAP1 CKS2 PIAS2 GDF5 ESPL1 CHD4 IRX6 STIP1 PIAS3 2600003E23RIK GRM7 PCOLN3 STAMB GLIS2 POFUT1 A630042L2 IRIK FEM1A VAX1 RBK MEN1 SPIN MBD4 EDG2 C330022B2 IRIK INVS FAH IFNZ TWIST2 EBF2 ACTN4 SMAD1 NRAS ZFP580 CDK7 ZBTB1 RHOX5 PRMT5 E2F6 TFPT ZBTB37 UHMK1 RIC8 STK38L ELF1 NKX2-6 WBP4 PLD2 ZFP579 E2F8 HPCA HOXD8 MTCP1 RELB CTNNA1 BC012278 AVEN RHOX4E CLEC2D MYNN GAPDHS BRMS1 TCERG1 CUL4A SERTAD2 CAPZA2 SIM1 WRNIP1 FOXJ3 2400003N08RIK NFE2L2 CEBPB MID1P1 LHX6 PPP1R12B NOTCH2 CTCF BTK PRDX2 RHOX4A DBF4 CDC7 TRAK1 ATF7 PPP1CA EDG1 THPO RGS2 ROR2 |
| 48519 | 2.04E-04 | 1.24E-02 | 60  | 1036 | negative regulation of biological process                                                                                                                                                                                                                                                                                                                                                                                                                                                                                                                                                                                                                                                                                                                                                                                                                          | E2F7 SPRED3 DRAP1 DDAH2 CHRD PCOLN3 KLF3 STAMB VAX1 ZFHXA1 CLASP1 A730008L03RIK PPP1R1B TWIST2 CUTL1 ACTN4 SMA1 MAL UHMK1 ELF1 SLA2 TEGT SOCS2 PLD2 WWTR1 HPCA ILF3 CTNNA1 AVEN CBX2 CLEC2D CAPZA1 BNIP2 BRMS1 TM4SF4 CUL4A SERTAD2 NCOA2 TBX2 BIRC1C BCL6B CAPZA2 IHPK2 2400003N08RIK ADRA1D TBX3 SUZ12 CEBPB C2TA MID1P1 NOTCH2 CTCF PRDX2 TEP1 CDC7 ATF7 CLN8 MECP2 RGS2 LRP6                                                                                                                                                                                                                                                                                                                                                                                                                                                                                                                                                                                                                                                                                                                                                                  |
| 48523 | 2.09E-04 | 1.24E-02 | 56  | 949  | negative regulation of cellular process                                                                                                                                                                                                                                                                                                                                                                                                                                                                                                                                                                                                                                                                                                                                                                                                                            | E2F7 DRAP1 DDAH2 CHRD PCOLN3 KLF3 STAMB VAX1 ZFHXA1 CLASP1 A730008L03RIK TWIST2 CUTL1 ACTN4 SMAD1 UHMK1 MAL ELF1 SLA2 TEGT PLD2 WWTR1 SOCS2 HPCA ILF3 CTNNA1 AVEN CBX2 CLEC2D CAPZA1 BNIP2 BRMS1 TM4SF4 CUL4A SERTAD2 NCOA2 TBX2 BIRC1C BCL6B CAPZA2 IHPK2 2400003N08RIK TBX3 SUZ12 CEBPB C2TA MID1P1 NOTCH2 CTCF PRDX2 TEP1 CDC7 ATF7 MECP2 RGS2 LRP6                                                                                                                                                                                                                                                                                                                                                                                                                                                                                                                                                                                                                                                                                                                                                                                            |
| 51243 | 2.70E-04 | 1.50E-02 | 50  | 828  | negative regulation of cellular physiological process                                                                                                                                                                                                                                                                                                                                                                                                                                                                                                                                                                                                                                                                                                                                                                                                              | E2F7 DRAP1 DDAH2 PCOLN3 KLF3 STAMB VAX1 ZFHXA1 CLASP1 A730008L03RIK TWIST2 CUTL1 SMAD1 ACTN4 UHMK1 MAL ELF1 SLA2 TEGT WWTR1 HPCA ILF3 CTNNA1 AVEN CBX2 CAPZA1 BNIP2 BRMS1 TM4SF4 CUL4A SERTAD2 NCOA2 TBX2 BIRC1C BCL6B CAPZA2 IHPK2 2400003N08RIK SUZ12 TBX3 CEBPB C2TA MID1P1 NOTCH2 CTCF PRDX2 TEP1 CDC7 ATF7 MECP2                                                                                                                                                                                                                                                                                                                                                                                                                                                                                                                                                                                                                                                                                                                                                                                                                             |
| 44260 | 2.81E-04 | 1.50E-02 | 152 | 3253 | cellular                                                                                                                                                                                                                                                                                                                                                                                                                                                                                                                                                                                                                                                                                                                                                                                                                                                           | UBE2T ADAM23 C1RL STC1 CDK6 APOE 3230401101RIK CNDP2 DPH5 FBXL14 EIF3S4 ETF1 OPN3 TSSK3 HYOU1 EIF1 CLASP1 TARS MC                                                                                                                                                                                                                                                                                                                                                                                                                                                                                                                                                                                                                                                                                                                                                                                                                                                                                                                                                                                                                                 |

|       |          |          |     |                          |                                                                                                                                                                                                                                                                                                                                                                                                                                                                                                                                                                                                                                                                                                                                                                                                                                                                                                      |                                                                                                                                                                                                                                                                                                                                                                                                                                                                                                                                                                                                                                                                                                                                                                                                                                                                                                                                                                                                                                                                |
|-------|----------|----------|-----|--------------------------|------------------------------------------------------------------------------------------------------------------------------------------------------------------------------------------------------------------------------------------------------------------------------------------------------------------------------------------------------------------------------------------------------------------------------------------------------------------------------------------------------------------------------------------------------------------------------------------------------------------------------------------------------------------------------------------------------------------------------------------------------------------------------------------------------------------------------------------------------------------------------------------------------|----------------------------------------------------------------------------------------------------------------------------------------------------------------------------------------------------------------------------------------------------------------------------------------------------------------------------------------------------------------------------------------------------------------------------------------------------------------------------------------------------------------------------------------------------------------------------------------------------------------------------------------------------------------------------------------------------------------------------------------------------------------------------------------------------------------------------------------------------------------------------------------------------------------------------------------------------------------------------------------------------------------------------------------------------------------|
|       |          |          |     | macromolecule metabolism | T1 CDC16 D7WSU128E UBTD1 BRCC3 TUBB3 CSNK1G1 B3GALT6 SIL1 PJA1 MAST2 HEMK1 GYS1 MAST1 MRPL17 ILF3 PTPRK FBXO44 CSK1N RLF GM711 RUVBL2 PIGQ RPL36 4933424A20RIK FBXO6B CAPZA1 EIF5 PSMB5 RPS12 RWDD4A USP3 TM4SF4 PRKAR1A MCPT4 EIF3S3 GAG X83328 WBSCR18 CRKRS PRSS15 FBXL21 MCPT2 UBE2E3 PDK3 UBE2D3 SPCS1 SUZ12 GSPT2 UBE2M PARS2 OASL1 POMT2 TEP1 USP43 DCAMKL2 UBB RPS27A D11BWG0434E PIAS2 NPR2 ESPL1 PIAS3 MRPL37 NLN STAMBPIP POFUT1 MEN1 C2 EPHB2 HLC PIGT SMAD1 MRPL14 CDK7 1700030G11RIK WASF1 PRMT5 FKBP7 TARSL2 UHMK1 KLHL12 STK38L AMFR ELF1 C1R TIMM8A1 SECISBP2 M ETAP2 PLD2 PGPEP1 HECW1 RPS5 ZDHHC7 VARS2 LRPAP1 RPS28 DUSP3 PLAT UBE3B CUL4A CDC25C ADAMTS2 CAPZA2 FBXO38 ADPRH BAG5 M GAT3 USP27X PTPRG CEBPB BACE2 MID1IP1 1700016G05RIK PRKAG3 BTK B3GNT6 UBQLN4 CDC7 TRAK1 HS2ST1 9130017K11RIK PCSK4 PPP1CA CLN8 4732466D17RIK ATG9A APOA1 RPS21 NDUFAF1 PSMA7 DLR ROR2 PHKA2 |                                                                                                                                                                                                                                                                                                                                                                                                                                                                                                                                                                                                                                                                                                                                                                                                                                                                                                                                                                                                                                                                |
| 51244 | 2.85E-04 | 1.50E-02 | 160 | 3456                     | regulation of cellular physiological process                                                                                                                                                                                                                                                                                                                                                                                                                                                                                                                                                                                                                                                                                                                                                                                                                                                         | CDK6 APOE KRAS ZFP715 EIF3S4 KLF3 PRDX1 PLAGL2 ZFHX1A REX2 CLASP1 MINA CDC16 A730008L03RIK 4930432O21RIK CUTL1 SS18L1 PRKCBP1 2610031L17RIK TGIF2 BRD8 MAL SLA2 TEGT SOC2 M AST2 WWTR1 ILF3 SERINC3 2610305D13RIK CCNE2 MMS19L MSC M YT1L TSHZ3 ERCC2 ZFP397 CBX2 CAPZA1 EIF5 PHF6 TRERF1 BNIP2 M FGE8 CDX4 TM4SF4 PRKAR1A NCOA2 BRWD1 BIRC1C TBX2 PHF15 BCL6B DDX54 IHPK2 PIK3CB UBE2E3 ADRA1D TBX3 SUZ12 ZFP263 GSPT2 C2TA UGP2 9030624G23RIK TSC22D4 D1ERTD161E THRAP5 PHF10 TEP1 NR2F2 RXR MECP2 E2F7 IRX3 FOSL1 DDAH2 DRAP1 CKS2 PIAS2 GDF5 ESPL1 CHD4 IRX6 PIAS3 GRM7 PCOLN3 STAMBPIP GLIS2 POFUT1 A630042L21RIK FEM1A VAX1 RBK MEN1 SPIN MBD4 EDG2 C330022B21RIK INVS FAH IFNZ TWIST2 EBF2 ACTN4 SMAD1 NRAS ZFP580 CDK7 ZBTB1 RHOX5 PRMT5 E2F6 TFPT ZBTB37 UHMK1 STK38L ELF1 NKK2-6 WBP4 ZFP579 E2F8 HPCA HOXD8 MTCP1 RELB CTNNA1 BC012278 AVEN RHOX4E CLEC2D MYNN GAPDHS BRMS1 TCERG1 CUL4A SER TAD2 CAPZA2 SIM1 WRNIP1 FOXJ3 2400003N08RIK NFE2L2 CEBPB MID1IP1 LHX6 PPP1R12B NOTCH2 CTCF BTK PRDX2 RHOX4A DBF4 CDC7 TRAK1 ATF7 PPP1CA EDG1 THPO ROR2 |
| 44267 | 3.12E-04 | 1.59E-02 | 150 | 3210                     | cellular protein metabolism                                                                                                                                                                                                                                                                                                                                                                                                                                                                                                                                                                                                                                                                                                                                                                                                                                                                          | UBE2T ADAM23 C1RL STC1 CDK6 APOE 3230401H01RIK CNDP2 DPH5 FBXL14 EIF3S4 ETF1 OPN3 TSSK3 HYOU1 EIF1 CLASP1 TARS MCPT1 CDC16 D7WSU128E UBTD1 BRCC3 TUBB3 CSNK1G1 B3GALT6 SIL1 PJA1 MAST2 HEMK1 MAST1 MRPL17 ILF3 PTPRK FBXO44 PCSK1N RLF GM711 RUVBL2 PIGQ RPL36 4933424A20RIK FBXO6B CAPZA1 EIF5 PSMB5 RPS12 RWDD4A USP3 TM4SF4 PRKAR1A MCPT4 EIF3S3 GAG X83328 WBSCR18 CRKRS PRSS15 FBXL21 MCPT2 UBE2E3 PDK3 UBE2D3 SPCS1 SUZ12 GSPT2 UBE2M PARS2 OASL1 POMT2 TEP1 USP43 DCAMKL2 UBB RPS27A D11BWG0434E PIAS2 NPR2 ESPL1 PIAS3 MRPL37 NLN STAMBPIP POFUT1 MEN1 C2 EPHB2 HLC PIGT SMAD1 MRPL14 CDK7 1700030G11RIK WASF1 PRMT5 FKBP7 TARSL2 UHMK1 KLHL12 STK38L AMFR ELF1 C1R TIMM8A1 SECISBP2 M ETAP2 PLD2 PGPEP1 HECW1 RPS5 ZDHHC7 VARS2 LRPAP1 RPS28 DUSP3 PLAT UBE3B CUL4A CDC25C ADAMTS2 CAPZA2 FBXO38 ADPRH BAG5 M GAT3 USP27X PTPRG CEBPB BACE2 MID1IP1 1700016G05RIK BTK B3GNT6 UBQLN4 CDC7 TRAK1 HS2ST1 9130017K11RIK PCSK4 PPP1CA CLN8 4732466D17RIK ATG9A APOA1 RPS21 NDUFAF1 PSMA7 DLR ROR2 PHKA2                                                    |
| 43118 | 4.00E-04 | 1.96E-02 | 51  | 864                      | negative regulation of physiological process                                                                                                                                                                                                                                                                                                                                                                                                                                                                                                                                                                                                                                                                                                                                                                                                                                                         | E2F7 DRAP1 DDAH2 PCOLN3 KLF3 STAMBPIP VAX1 ZFHX1A CLASP1 A730008L03RIK TWIST2 CUTL1 SMAD1 ACTN4 UHMK1 MAL ELF1 SLA2 TEGT WWTR1 HPCA ILF3 CTNNA1 AVEN CBX2 CAPZA1 BNIP2 BRMS1 TM4SF4 CUL4A SERTAD2 NCOA2 TBX2 BIRC1C BCL6B CAPZA2 IHPK2 2400003N08RIK ADRA1D SUZ12 TBX3 CEBPB C2TA MID1IP1 NOTCH2 CTCF PRDX2 TEP1 CDC7 ATF7 MECP2                                                                                                                                                                                                                                                                                                                                                                                                                                                                                                                                                                                                                                                                                                                               |
| 6357  | 6.51E-04 | 3.02E-02 | 30  | 438                      | regulation of transcription from RNA polymerase II promoter                                                                                                                                                                                                                                                                                                                                                                                                                                                                                                                                                                                                                                                                                                                                                                                                                                          | CBX2 DRAP1 FOSL1 PRKAR1A NCOA2 BRWD1 TBX2 GLIS2 KLF3 BCL6B PLAGL2 VAX1 ZFHX1A EDG2 TBX3 SUZ12 TWIST2 CUTL1 SMAD1 E2F6 CTCF 2610031L17RIK THRAP5 BRD8 TRAK1 ATF7 NR2F2 ELF1 SLA2 WWTR1                                                                                                                                                                                                                                                                                                                                                                                                                                                                                                                                                                                                                                                                                                                                                                                                                                                                          |
| 7049  | 6.59E-04 | 3.02E-02 | 45  | 752                      | cell cycle                                                                                                                                                                                                                                                                                                                                                                                                                                                                                                                                                                                                                                                                                                                                                                                                                                                                                           | E2F7 MYH10 CKS1B CDK6 CKS2 BRMS1 KRAS ESPL1 CDCA8 CUL4A SPO11 CDC25C STAG3 PCOLN3 DIP3B MEN1 PIK3CB SPIN CDC16 GSPT2 IFNZ ACTN4 NRAS CDK7 TXNL4B NOTCH2 PRMT5 RANBP1 E2F6 CTCF DBF4 CDC7 TEP1 UHMK1 PPP1CA MLH3 MEI1 SYCP1 E2F8 M                                                                                                                                                                                                                                                                                                                                                                                                                                                                                                                                                                                                                                                                                                                                                                                                                              |

|       |          |          |     |      |                                               |                                                                                                                                                                                                                                                                                                                                                                                                                                                                                                                                                                                                                                                                                                        |
|-------|----------|----------|-----|------|-----------------------------------------------|--------------------------------------------------------------------------------------------------------------------------------------------------------------------------------------------------------------------------------------------------------------------------------------------------------------------------------------------------------------------------------------------------------------------------------------------------------------------------------------------------------------------------------------------------------------------------------------------------------------------------------------------------------------------------------------------------------|
|       |          |          |     |      |                                               | TCP1 ILF3 THPO CCNE2 RGS2 RELB                                                                                                                                                                                                                                                                                                                                                                                                                                                                                                                                                                                                                                                                         |
| 6512  | 8.64E-04 | 3.73E-02 | 26  | 366  | ubiquitin cycle                               | UBE2T FBXO6B PIAS2 RWDD4A USP3 CUL4A UBE3B PIAS3 FBXL14 FBXL21 STAMBP FBXO38 UBE2E3 CDC16 UBE2D3 BRCC3 SUZ12 UBE2M 9130017K11RIK KLHL12 AMFR USP43 PJA1 ATG9A FBXO44 HECW1                                                                                                                                                                                                                                                                                                                                                                                                                                                                                                                             |
| 6366  | 8.79E-04 | 3.73E-02 | 36  | 570  | transcription from RNA polymerase II promoter | CBX2 FOSL1 DRAP1 TCERG1 PRKAR1A NCOA2 BRWD1 TBX2 BCL6B GLIS2 KLF3 PLAGL2 VAX1 ZFH1A NFE2L2 EDG2 TBX3 SUZ12 CEBPB TWIST2 CUTL1 SMAD1 CDK7 E2F6 CTCF 2610031L17RIK THRAP5 BRD8 TRAK1 ATF7 NR2F2 ELF1 SLA2 WWTR1 MSC ERCC2                                                                                                                                                                                                                                                                                                                                                                                                                                                                                |
| 7127  | 8.91E-04 | 3.73E-02 | 6   | 32   | meiosis I                                     | STAG3 MLH3 CKS2 SYCP1 ESPL1 SPO11                                                                                                                                                                                                                                                                                                                                                                                                                                                                                                                                                                                                                                                                      |
| 6996  | 1.05E-03 | 4.27E-02 | 64  | 1197 | organelle organization and biogenesis         | HIST2H2AA1 APOE CKS2 HIST1H2BM HIST1H1B ESPL1 CHD4 NOL5A KRT2-1 PCOLN3 HIST1H3B HIST1H2BP MEN1 CLASP1 PEX16 KIF20A DNAI1 TUBB3 SMARCAL1 PLA2G1B ACTN4 ABCD1 MRPL14 WASF1 CTE3 RANBP1 PRMT5 NEB SMARCA5 BRD8 ELF1 TIMM8A1 MAST1 MRPL17 MYH8 RPS5 LSP1 HIST1H3A CBX2 MYH10 HIST1H3D CAPZA1 HIST1H3G RPS12 HIST1H3I HIST2H3C2 CAPZA2 2400003N08RIK HIST1H3C HIST1H3H SUZ12 MID1IP1 ACTG1 APXL STX6 HIST2H2AA2 HIST1H3E TEP1 MYH13 HIST1H3F CLN8 ATG9A HIST2H3C1 HIST2H3B                                                                                                                                                                                                                                  |
| 16481 | 1.08E-03 | 4.28E-02 | 21  | 275  | negative regulation of transcription          | TBX3 A730008L03RIK SUZ12 CUTL1 CBX2 TWIST2 C2TA DRAP1 CTCF NCOA2 PCOLN3 TBX2 BCL6B KLF3 SLA2 VAX1 MECP2 WWTR1 ZFH1A ILF3 2400003N08RIK                                                                                                                                                                                                                                                                                                                                                                                                                                                                                                                                                                 |
| 6355  | 1.19E-03 | 4.59E-02 | 103 | 2133 | regulation of transcription, DNA-dependent    | ZFP715 KLF3 PLAGL2 ZFH1A REX2 A730008L03RIK 4930432O21RIK CUTL1 SS18L1 PRKCBP1 2610031L17RIK TGIF2 BRD8 MAL SLA2 WWTR1 ILF3 2610305D13RIK MSC MMS19L MYT1L ERCC2 TSHZ3 ZFP397 CBX2 PHF6 TRERF1 CDX4 PRKAR1A NCOA2 PHF15 TBX2 BIRC1C BRWD1 BCL6B DDX54 SUZ12 ZFP263 TBX3 C2TA UGP2 9030624G23RIK D1ERTD161E TSC22D4 THRAP5 PHF10 NR2F2 RXR MECP2 E2F7 IRX3 DRAP1 FOSL1 PIAS2 IRX6 CHD4 PIAS3 PCOLN3 GLIS2 FEM1A A630042L21RIK VAX1 RBAK SPIN EDG2 INVS C330022B21RIK FAH TWIST2 EBF2 SMAD1 CDK7 ZFP580 ZBTB1 PRMT5 RHOX5 E2F6 ZBTB37 ELF1 NKX2-6 WBP4 ZFP579 E2F8 HOXD8 RELB BC012278 RHOX4E MYNN TCERG1 SERTAD2 SIM1 FOXJ3 2400003N08RIK NFE2L2 CEBPB LHX6 PPP1R12B NOTCH2 CTCF RHOX4A TRAK1 ATF7 ROR2 |
| 9892  | 1.32E-03 | 4.96E-02 | 26  | 377  | negative regulation of metabolism             | CBX2 CAPZA1 DRAP1 PCOLN3 NCOA2 TBX2 KLF3 BCL6B CAPZA2 VAX1 ZFH1A 2400003N08RIK CLASP1 SUZ12 A730008L03RIK TBX3 TWIST2 CUTL1 C2TA MID1IP1 CTCF ELF1 SLA2 WWTR1 MECP2 ILF3                                                                                                                                                                                                                                                                                                                                                                                                                                                                                                                               |

**Table S2.** Affymetrix analysis of gene upregulation in response to H<sub>2</sub>O<sub>2</sub> in ES cells. M430 2.0 array data obtained from three untreated and three H<sub>2</sub>O<sub>2</sub>-treated RNA samples were compared using DChip software. SIRT1-associated genes with a  $\geq 15\%$  transcriptional increase ( $P < 0.1$ ) are shown. All genes with  $\geq 2\log_2$  SIRT1 binding were subjected to validation by q-RT-PCR. Genes that were validated by q-RT-PCR using independently derived samples are highlighted in blue. Genes that could not be validated are shown in red.

| affy_probe   | Accession    | gene                                                           | fold change | P value | S1 ChIP (log <sub>2</sub> ) |
|--------------|--------------|----------------------------------------------------------------|-------------|---------|-----------------------------|
| 1421683_at   | NM_011560    | t-complex-associated testis expressed 3                        | 2.57        | 0.001   | 2.63                        |
| 1417488_at   | NM_010235    | fos-like antigen 1                                             | 1.98        | 0.004   | 1.515                       |
| 1422980_a_at | NM_018742    | blocked early in transport 1 homolog (S. cerevisiae)-like      | 1.72        | 0.003   | 1.676                       |
| 1437063_at   | NM_010192    | feminization 1 homolog a (C. elegans)                          | 1.45        | 0.062   | 2.342                       |
| 1436595_at   | NM_172762    | RNA binding motif protein 34                                   | 1.43        | 0.040   | 2.81                        |
| 1434299_x_at | NM_025931    | RAB, member of RAS oncogene family-like 4                      | 1.4         | 0.003   | 1.06                        |
| 1427552_a_at | NM_010363    | glutathione transferase zeta 1 (maleylacetoacetate isomerase)  | 1.36        | 0.014   | 2.91                        |
| 1452289_a_at | NM_028019    | ring finger protein 135                                        | 1.3         | 0.033   | 1.063                       |
| 1417165_at   | NM_010773    | methyl-CpG binding domain protein 2                            | 1.3         | 0.050   | 1.101                       |
| 1447480_at   | NM_207667    | Fibroblast growth factor 14                                    | 1.26        | 0.086   | 1.639                       |
| 1417815_a_at | NM_012032    | serine incorporator 3                                          | 1.25        | 0.059   | 2.461                       |
| 1438982_s_at | NM_029798    | RIKEN cDNA 2810417J12 gene                                     | 1.25        | 0.036   | 1.495                       |
| 1423711_at   | NM_027175    | NADH dehydrogenase 1 alpha subcomplex, assembly factor 1       | 1.25        | 0.036   | 2.741                       |
| 1424583_at   | NM_145519    | FERM, RhoGEF and pleckstrin domain protein 2                   | 1.24        | 0.072   | 2.013                       |
| 1434975_x_at | NM_001004146 | RIKEN cDNA 4933439C20 gene                                     | 1.22        | 0.031   | 1.141                       |
| 1420642_a_at | NM_025946    | RIKEN cDNA 2010100O12 gene                                     | 1.21        | 0.035   | 1.179                       |
| 1416841_at   | NM_025423    | RIKEN cDNA 1110059E24 gene                                     | 1.21        | 0.013   | 1.75                        |
| 1424494_s_at | NM_029798    | RIKEN cDNA 2810417J12 gene                                     | 1.2         | 0.025   | 1.495                       |
| 1422797_at   | NM_031248    | mitogen activated protein binding protein interacting protein  | 1.2         | 0.010   | 1.795                       |
| 1424045_at   | NM_027457    | RIKEN cDNA 5730437N04 gene                                     | 1.19        | 0.027   | 1.882                       |
| 1426387_x_at | NM_177298    | phosphatidylserine decarboxylase                               | 1.19        | 0.051   | 3.043                       |
| 1454092_a_at | NM_181410    | general transcription factor IIIH, polypeptide 3               | 1.19        | 0.013   | 1.26                        |
| 1423610_at   | NM_019648    | methionine aminopeptidase 2                                    | 1.18        | 0.012   | 3.489                       |
| 1433719_at   | NM_177909    | solute carrier family 9 (sodium/hydrogen exchanger), isoform 9 | 1.17        | 0.091   | 2.851                       |
| 1426894_s_at | NM_153560    | RIKEN cDNA C230093N12 gene                                     | 1.17        | 0.091   | 1.406                       |
| 1420486_at   | NM_023554    | nucleolar protein 7                                            | 1.17        | 0.029   | 2.449                       |
| 1448455_at   | NM_012000    | ceroid-lipofuscinosis, neuronal 8                              | 1.17        | 0.038   | 1.93                        |
| 1424883_s_at | NM_146083    | splicing factor, arginine/serine-rich 7                        | 1.16        | 0.023   | 1.042                       |
| 1460182_at   | NM_080557    | sorting nexin 4                                                | 1.16        | 0.016   | 1.997                       |
| 1415962_at   | NM_080635    | eukaryotic translation initiation factor 3, subunit 3 (gamma)  | 1.15        | 0.024   | 3.967                       |

**Table S3.** Chromosomal aberrations of SIRT1 knock-down cells (KD) in response to H<sub>2</sub>O<sub>2</sub> treatment. Cells were treated with H<sub>2</sub>O<sub>2</sub> for 1 h, followed by 48 h recovery. Metaphases were analyzed by T-FISH. Numbers represent totals from two independent experiments, P values are based on Fisher's Exact Test, \* P < 0.05, \*\* P < 0.01, \*\*\* P < 0.001 comparing H<sub>2</sub>O<sub>2</sub> treated vs. untreated cells; ††† P < 0.001 comparing SIRT1 KD to control.

|                                | untreated    |              | H <sub>2</sub> O <sub>2</sub> |                      |
|--------------------------------|--------------|--------------|-------------------------------|----------------------|
|                                | control      | SIRT1-KD     | control                       | SIRT1 KD             |
| Total Metaphases               | 90           | 98           | 86                            | 74                   |
| Fragments/<br>Chromatid breaks | 5            | 1            | 7                             | 9**                  |
| Chromosome breaks              | 5            | 2            | 3                             | 4                    |
| Chromosome fusions/<br>circles | 3            | 11           | 6                             | 23**, <sup>†††</sup> |
| <b>Total aberrations</b>       | <b>14.4%</b> | <b>13.3%</b> | <b>18.6%</b>                  | <b>48.6%</b>         |
| <b>Aberrant metaphases</b>     | <b>13.2%</b> | <b>12.3%</b> | <b>17.5%</b>                  | <b>30.4%</b>         |

**Table S4.** List of SIRT1-target genes (FDR<0.005) that are deregulated with age in the neocortex of B6C3F<sub>1</sub> mice (*P*<0.005).

| Entrez Gene ID | probe set    | gene                                                                 | fold change | P value  |
|----------------|--------------|----------------------------------------------------------------------|-------------|----------|
| 320951, 66776  | 1435426_s_at | RIKEN cDNA 4933439C20, phosphatidylserine decarboxylase              | 4.79        | 0.00436  |
| 16792          | 1436905_x_at | lysosomal-associated protein transmembrane 5                         | 2.1         | 0.000042 |
| 211499         | 1424454_at   | transmembrane protein 87A                                            | 1.77        | 0.000499 |
| 50909          | 1417009_at   | complement component 1, r subcomponent                               | 1.72        | 0.002932 |
| 19718          | 1457669_x_at | replication factor C (activator 1) 2                                 | 1.7         | 0.000121 |
| 23792          | 1423378_at   | a disintegrin and metallopeptidase domain 23                         | 1.66        | 0.000028 |
| 67448          | 1418912_at   | plexin domain containing 2                                           | 1.63        | 0.000041 |
| 67095          | 1459666_at   | trafficking protein, kinesin binding 1                               | 1.62        | 0.000864 |
| 12175          | 1422490_at   | BCL2/adenovirus E1B interacting protein 1, NIP2                      | 1.56        | 0.000042 |
| 331004         | 1433719_at   | solute carrier family 9 (sodium/hydrogen exchanger), isoform 9       | 1.56        | 0.00014  |
| 66838          | 1453141_at   | RIKEN cDNA 0610009L18 gene                                           | 1.53        | 0.001976 |
| 329251         | 1434786_at   | protein phosphatase 1, regulatory (inhibitor) subunit 12B            | 1.52        | 0.000323 |
| 69714          | 1438963_s_at | TCF3 (E2A) fusion partner                                            | 1.51        | 0.002245 |
| 11973          | 1420038_at   | VATPase, H <sup>+</sup> transporting, lysosomal V1 subunit E1        | 1.49        | 0.000268 |
| 13047          | 1451435_at   | cut-like 1 (Drosophila)                                              | 1.47        | 0.000947 |
| 27053          | 1433966_x_at | asparagine synthetase                                                | 1.43        | 0.000941 |
| 97064          | 1417818_at   | WW domain containing transcription regulator 1                       | 1.42        | 0.00014  |
| 12846          | 1418701_at   | catechol-O-methyltransferase                                         | 1.41        | 0.000144 |
| 72479          | 1426856_at   | hydroxysteroid dehydrogenase like 2                                  | 1.41        | 0.000299 |
| 109263         | 1427171_at   | rearranged L-myc fusion sequence                                     | 1.39        | 0.001796 |
| 75007          | 1438321_x_at | RIKEN cDNA 4930504E06 gene                                           | 1.39        | 0.002745 |
| 20643          | 1451294_s_at | small nuclear ribonucleoprotein E                                    | 1.38        | 0.000335 |
| 240614         | 1435167_at   | RAN binding protein 6                                                | 1.38        | 0.000409 |
| 106583         | 1455310_at   | RNA binding motif protein 16                                         | 1.38        | 0.002638 |
| 64164          | 1458364_s_at | interferon alpha responsive gene                                     | 1.36        | 0.000242 |
| 66114          | 1418081_at   | Williams-Beuren syndrome chromosome region 18 homolog (human)        | 1.36        | 0.002663 |
| 56280          | 1423764_s_at | mitochondrial ribosomal protein L37                                  | 1.35        | 0.000071 |
| 13018          | 1418330_at   | CCCTC-binding factor                                                 | 1.35        | 0.000719 |
| 71990          | 1438853_x_at | DEAD (Asp-Glu-Ala-Asp) box polypeptide 54                            | 1.33        | 0.000211 |
| 114873         | 1441706_at   | Down syndrome cell adhesion molecule-like 1                          | 1.33        | 0.002378 |
| 67489          | 1416631_at   | adaptor-related protein complex AP-4, beta 1                         | 1.32        | 0.004436 |
| 75695          | 1447852_x_at | RIKEN cDNA 2900002H16 gene                                           | 1.3         | 0.002295 |
| 229722         | 1442113_at   | RIKEN cDNA 5330417C22 gene                                           | 1.3         | 0.004258 |
| 52202          | 1436595_at   | RNA binding motif protein 34                                         | 1.29        | 0.002776 |
| 66162          | 1434545_x_at | bolA-like 2 (E. coli)                                                | 1.28        | 0.002077 |
| 20932          | 1416213_x_at | surfeit gene 4                                                       | 1.28        | 0.003058 |
| 13026          | 1438011_at   | phosphate cytidyltransferase 1, choline, alpha isoform               | 1.27        | 0.000117 |
| 78829          | 1448412_a_at | TSC22 domain family 4                                                | 1.27        | 0.001027 |
| 241296         | 1434694_at   | leucine rich repeat containing 8A                                    | 1.27        | 0.001334 |
| 320910         | 1436223_at   | integrin beta 8                                                      | 1.27        | 0.004578 |
| 26943          | 1434548_at   | serine incorporator 3                                                | 1.25        | 0.00041  |
| 17933          | 1429738_at   | myelin transcription factor 1-like                                   | 1.25        | 0.00088  |
| 218544         | 1451529_at   | small glutamine-rich tetratricopeptide repeat (TPR)-containing, beta | 1.25        | 0.001029 |
| 14784          | 1449111_a_at | growth factor receptor bound protein 2                               | 1.24        | 0.001892 |

**Cell, Volume 135**

|        |              |                                                                                      |       |          |
|--------|--------------|--------------------------------------------------------------------------------------|-------|----------|
| 71069  | 1447624_s_at | storkhead box 2                                                                      | 1.23  | 0.000502 |
| 56307  | 1434120_a_at | methionine aminopeptidase 2                                                          | 1.22  | 0.001864 |
| 19735  | 1447830_s_at | regulator of G-protein signaling 2                                                   | 1.22  | 0.004918 |
| 60315  | 1424088_at   | melanocyte proliferating gene 1                                                      | 1.21  | 0.002547 |
| 17125  | 1448208_at   | MAD homolog 1 (Drosophila)                                                           | 1.21  | 0.003539 |
| 54399  | 1422980_a_at | blocked early in transport 1 homolog (S. cerevisiae)-like                            | 1.21  | 0.004001 |
| 78825  | 1425185_at   | RIKEN cDNA 5830417C01 gene                                                           | 1.21  | 0.004368 |
| 216578 | 1427241_at   | poly(A) polymerase gamma                                                             | 1.2   | 0.000996 |
| 80985  | 1421870_at   | tripartite motif-containing 44                                                       | 1.2   | 0.001747 |
| 69536  | 1430287_s_at | HemK methyltransferase family member 1                                               | 1.2   | 0.003087 |
| 70544  | 1424045_at   | RIKEN cDNA 5730437N04 gene                                                           | 1.2   | 0.004037 |
| 77579  | 1452740_at   | myosin, heavy polypeptide 10, non-muscle                                             | 1.19  | 0.00073  |
| 16976  | 1426697_a_at | low density lipoprotein receptor-related protein associated protein 1                | 1.19  | 0.001593 |
| 207425 | 1452820_at   | bromodomain and WD repeat domain containing 2                                        | 1.19  | 0.002536 |
| 51796  | 1447447_s_at | serine/arginine repetitive matrix 1                                                  | 1.17  | 0.003672 |
| 20918  | 1423799_at   | eukaryotic translation initiation factor 1                                           | 1.13  | 0.002394 |
| 68365  | 1419246_s_at | RAB14, member RAS oncogene family                                                    | 1.12  | 0.001018 |
| 69207  | 1452371_at   | splicing factor, arginine/serine-rich 11                                             | -1.14 | 0.001748 |
| 67331  | 1438604_at   | ATPase, Class I, type 8B, member 3                                                   | -1.19 | 0.002219 |
| 72057  | 1449085_at   | PHD finger protein 10                                                                | -1.24 | 0.00039  |
| 78656  | 1452350_at   | bromodomain containing 8                                                             | -1.26 | 0.004776 |
| 216028 | 1434761_at   | leucine rich repeat transmembrane neuronal 3                                         | -1.32 | 0.003804 |
| 27397  | 1450867_at   | mitochondrial ribosomal protein L17                                                  | -1.34 | 0.000634 |
| 18092  | 1452018_at   | NK2 transcription factor related, locus 6 (Drosophila)                               | -1.36 | 0.000448 |
| 320951 | 1460585_x_at | phosphatidylserine decarboxylase                                                     | -1.53 | 0.000599 |
| 387314 | 1439855_at   | cDNA sequence BC023818                                                               | -1.53 | 0.003681 |
| 114893 | 1425986_a_at | DCUN1D1 DCN1, defective in cullin neddylation 1, domain containing 1 (S. cerevisiae) | -1.7  | 0.001794 |
| 218763 | 1451245_at   | leucine rich repeat containing 3B                                                    | -1.78 | 0.002955 |
| 68283  | 1429916_at   | RIKEN cDNA 9530077C05 gene                                                           | -1.86 | 0.004644 |

**Table S5.** Primers used in this study. \* 74 bp sequence is repeated spaced by 160-190 bp. Predominant PCR product is ~230bp. LC: light cycler (Roche), LC480: Roche 96 wp q-PCR instrument.

| Gene            | SEQUENCE (5'-3')             | AT | SYBRKit/<br>Instrument | Size (bp) |
|-----------------|------------------------------|----|------------------------|-----------|
| <b>ChIP</b>     |                              |    |                        |           |
| Farp2 (F)       | F: TGCAAGTCTGAAGTGGAAGGACCA  | 56 | QIAgen/LC              | 432       |
|                 | R: AAGGCGACGGGAGGATTCTATCTT  |    |                        |           |
| DRGFP           | F: TCTTCTTCAAGGACGACGGCAACT  | 60 | Roche/LC480            | 145       |
|                 | R: TTGTAGTTGTACTCCAGCTTGTGC  |    |                        |           |
| Gapdh           | F: CCAATGTGTCCGTCGTGGATCT    | 56 | Roche/LC               | 155       |
|                 | R: GTTGAAGTCGCAGGAGACAACC    |    |                        |           |
| LINE1           | F: ATGGCGAAAGGCAAACGTAAG     | 56 | Roche/LC               | 114       |
|                 | R: ATTTTCGGTTGTGTTGGGGTG     |    |                        |           |
| Major sat. rep. | F: GACGACTTGAAAAATGACGAAATC  | 56 | Roche/LC               | 74*       |
|                 | R: CATATCCAGGTCCTTCAGTGTGC   |    |                        |           |
| Prkag3          | F: TCCAGCAGGAAACCCAATAGTCCA  | 56 | QIAgen/LC              | 586       |
|                 | R: TGGCTTCCTTCACTTCTCCTCCA   |    |                        |           |
| Slc9a9          | F: TGTGCCGGGTTGAACTGTCTTACT  | 56 | QIAgen/LC              | 338       |
|                 | R: TAGACTGGCGCCACAGAATTTCA   |    |                        |           |
| <b>NHEJ</b>     |                              |    |                        |           |
| NHEJ            | F: AGGGCGGGGTTCTGGCTTCTGG    | 60 | N/A                    | 725       |
|                 | R: CCTTCGGGCATGGCGGACTTGA    |    |                        |           |
| <b>RT-PCR</b>   |                              |    |                        |           |
| $\beta$ -actin  | F: GGCCAGGTCATCACTATTGGCAAC  | 60 | Roche/LC480            | 228       |
|                 | R: CAGAGCAGTAATCTCCTTCTGCAT  |    |                        |           |
| B2m             | F: TGGTCTTCTGGTGCTTGTCTCAC   | 60 | Roche/LC480            | 151       |
|                 | R: ATTTCAATGTGAGGCGGGTGGAAAC |    |                        |           |
| Gapdh           | F: GGAGCCAAAAGGGTCATCATCTC   | 60 | Roche/LC480            | 234       |
|                 | R: AGAGGGGCCATCCACAGTCTTCT   |    |                        |           |
| Hprt            | F: GCCTAAGATGAGCGCAAGTTG     | 60 | Roche/LC480            | 101       |
|                 | R: TACTAGGCAGATGGCCACAGG     |    |                        |           |
| Rps16           | F: AATGGGCTCATCAAGGTGAACGGA  | 60 | Roche/LC480            | 185       |
|                 | R: TTTGAGATGGACTGTCCGATGGCA  |    |                        |           |



**Cell, Volume 135**

|         |                              |    |             |     |
|---------|------------------------------|----|-------------|-----|
| Bet11   | F: ACCAGGCTTAAATCGCTGGCTTTG  | 60 | Roche/LC480 | 186 |
|         | R: GACCACAGCCATACCACACAGAA   |    |             |     |
| Btg2    | F: TGAGCGAGCAGAGACTCAAGGTTT  | 60 | Roche/LC480 | 113 |
|         | R: ACAGCGATAGCCAGAACCTTTGGA  |    |             |     |
| Farp2   | F: ATCCAAGCAGCCAAGACTATCGGT  | 60 | Roche/LC480 | 241 |
|         | R: AAAGCTGGTTCTCAACAGCTGCAC  |    |             |     |
| Gstz1   | F: TGGGACAGGAGAACCAGATGCAAT  | 60 | Roche/LC480 | 132 |
|         | R: AGCACACATCAGCCATGGATACCT  |    |             |     |
| Pisd    | F: AGGGAATGAGCTGTACCACTGTGT  | 60 | Roche/LC480 | 310 |
|         | R: ATTGTAGGAGCCCTTGCTGTACCT  |    |             |     |
| Ptp4a3  | F: GTTCAAAGACCCACACACGCACAA  | 60 | Roche/LC480 | 147 |
|         | R: AGAAAGACAGCCGTGGGTACAGAT  |    |             |     |
| Prkag3  | F: ATGCACTTCATGCAGGAACACACC  | 60 | Roche/LC480 | 297 |
|         | R: AGGCTTGAAGCAGCCTTGTTAGGTA |    |             |     |
| Serinc3 | F: TTTACCTCACGTGGTCAGCCATGA  | 60 | Roche/LC480 | 104 |
|         | R: TGCAGGAGACACAGTTGGTGAAGT  |    |             |     |
| Slc9a9  | F: AGGCAACGCCATACTGGAGAAGAT  | 60 | Roche/LC480 | 166 |
|         | R: ACAGGAGATGGCTGTTCCCAAGAA  |    |             |     |
| Slc19a2 | F: TCTCCTGATTGCTGCTGCAGTGTA  | 60 | Roche/LC480 | 192 |
|         | R: AATGCCAGGGCAATGAAGGTGTTT  |    |             |     |
| Tbcel   | F: TGTGCTCACGTGTCAGAACTCGAT  | 60 | Roche/LC480 | 187 |
|         | R: TGTTGAGGACAAGTTTGCGAACCC  |    |             |     |
| Tetc3   | F: GGCAGATCGAATATTGGCAGCAGT  | 60 | Roche/LC480 | 196 |
|         | R: AGCAAACACCAAGGCCAATACCAC  |    |             |     |
| Jarid1c | F: AGATTCCCAATGTAGAACGGCGGA  | 60 | Roche/LC480 | 168 |
|         | R: AGTGAGAGCGTAGCAAGGAACCAA  |    |             |     |
| Zfp622  | F: AAGCTCTTCACAGATGGTGACGCT  | 60 | Roche/LC480 | 124 |
|         | R: TCTTGTCTGTGGACAAGGCCTCAA  |    |             |     |
| Cnn3    | F: TGCGCAACTGGATAGAAGAGGTGA  | 60 | Roche/LC480 | 115 |
|         | R: ACAGAGCCTGGCTGTAGCTTGTTT  |    |             |     |
| Nucks1  | F: AGAAGATGATGAGGCGCCATTCCA  | 60 | Roche/LC480 | 187 |
|         | R: TGGCGTCACTGTTGCCTTTAGTCT  |    |             |     |
| Vim     | F: AATCCTTCCC CGATCCCTTCTTT  | 60 | Roche/LC480 | 101 |
|         | R: ACGAGGACACAGACCTGGTAGACAT |    |             |     |
| Gnao1   | F: TGTGGTCTACAGCAACACCATCCA  | 60 | Roche/LC480 | 124 |
|         | R: ACTCACCACGTCACACACCATCTT  |    |             |     |
| Ubc     | F: AAAGATCCAGGACAAGGAGGGCAT  | 60 | Roche/LC480 | 179 |

## Cell, Volume 135

|        |                              |    |             |     |
|--------|------------------------------|----|-------------|-----|
|        | R: TCTTGCCTGTCAGGGTCTTCACAA  |    |             |     |
| Aim11  | F: CGCCAAACCTGGAGCATCAATGAA  | 60 | Roche/LC480 | 140 |
|        | R: TGGGAAAGTCTGTCCTTGGTTGGT  |    |             |     |
| Cxcl16 | F: ACCCTTGTCTCTTGC GTTCTTCCT | 60 | Roche/LC480 | 147 |
|        | R: ATGTGATCCAAAGTACCCTGCGGT  |    |             |     |
| Gfap   | F: TGGCCACCAGTAACATGCAAGAGA  | 60 | Roche/LC480 | 121 |
|        | R: TAGTCGTTAGCTTCGTGCTTGGCT  |    |             |     |

### Supplemental References

Becker, E. B., and Bonni, A. (2006). Pin1 mediates neural-specific activation of the mitochondrial apoptotic machinery. *Neuron* 49, 655-662.

Weinstock, D. M., Nakanishi, K., Helgadottir, H. R., and Jasin, M. (2006). Assaying double-strand break repair pathway choice in mammalian cells using a targeted endonuclease or the RAG recombinase. *Methods Enzymol* 409, 524-540.
